1 **Diverse Configurations of Erroneous Predictive Coding Across Brain Hierarchies in a**  
2 **Non-Human Primate Model of Autism Spectrum Disorder**

3

4 Zenas C. Chao<sup>1\*</sup>, Misako Komatsu<sup>2,3,4\*</sup>, Madoka Matsumoto<sup>5</sup>, Kazuki Iijima<sup>5</sup>, Keiko  
5 Nakagaki<sup>4</sup>, Noritaka Ichinohe<sup>4\*</sup>

6

7 1. International Research Center for Neurointelligence (WPI-IRCN), UTIAS, The  
8 University of Tokyo, 113-0033, Japan

9 2. Institute of Innovative Research, Tokyo Institute of Technology, 226-8503, Japan

10 3. RIKEN Center for Brain Science, 351-0198, Japan

11 4. Department of Ultrastructural Research, National Institute of Neuroscience, National  
12 Center of Neurology and Psychiatry (NCNP), 187-8502, Japan

13 5. Department of Preventive Intervention for Psychiatric Disorders, National Institute of  
14 Mental Health, National Center of Neurology and Psychiatry (NCNP), 187-8553, Japan

15

16

17 **\*Correspondance:**

18 Zenas C. Chao (zenas.c.chao@gmail.com)

19 Noritaka Ichinohe (nichino@ncnp.go.jp)

20 Misako Komatsu (mskkomatsu@gmail.com)

21

22 Key terms:

23 Autism spectrum disorder (ASD); marmoset; electrocorticography (ECoG); predictive

24 coding; hierarchy; theoretical model;

1 **Abstract:**

2 In autism spectrum disorder (ASD), atypical sensory experiences are often associated with  
3 irregularities in predictive coding, which proposes that the brain creates hierarchical sensory  
4 models via a bidirectional process of predictions and prediction errors. However, it remains  
5 unclear how these irregularities manifest across different functional hierarchies in the brain.  
6 To address this, we used high-density electrocorticography (ECoG) in a non-human primate  
7 model of ASD during an auditory task with two layers of temporal control, and applied a  
8 quantitative model to quantify the integrity of predictive coding across two distinct  
9 hierarchies. Our results demonstrate that ASD is characterized by sensory hypersensitivity  
10 and unstable predictions across two brain hierarchies, and reveal the associated spatio-  
11 spectro-temporal neural signatures. Importantly, we observe diverse configurations of  
12 underestimation or overestimation of sensory regularities within these hierarchies. This work  
13 provides a multi-layered biomarker for ASD, contributing to our understanding of its diverse  
14 symptoms.

15

16

## 1 **Introduction:**

2 Autism Spectrum Disorder (ASD) is a neurodevelopmental condition that includes challenges  
3 in social interaction and communication, repetitive behaviors, sensory hypo/hypersensitivity,  
4 and difficulties adapting to change. Over 250 genes have been identified with strong links to  
5 ASD [1], and various brain structures have been associated with autistic traits [2]. However,  
6 the neural mechanism of ASD remains elusive, and diagnostic biomarkers are still  
7 unavailable [3].

8  
9 A leading mechanistic investigation of ASD focuses on its atypical sensory perception, such  
10 as hypersensitivities to light or sound, which is reported in around 90% of autistic adults [4].  
11 This sensory atypicality has been extensively explained by failures of Bayesian inference  
12 [5,6], such as overly-precise sensory observations [7–9], weak prior beliefs [6,10], slow  
13 belief updates [11,12], and disbalanced precision controls [10,13,14]. However, the  
14 corresponding behavioral evidence are inconsistent and conflicting. For example, prior  
15 beliefs in ASD have been shown to be both attenuated [15,16] and intact [8,17,18], and their  
16 variability has been reported to be both increased [19] and unaffected [8]. To directly test  
17 these Bayesian accounts of ASD, it is critical to identify their underlying neural  
18 implementations, which remains unknown.

19  
20 The most promising implementation of Bayesian inference is predictive coding, which  
21 proposes that the brain creates internal models of the sensory world by a hierarchical and  
22 bidirectional cascade of large-scale cortical signaling in order to minimize overall prediction  
23 errors [20–23]. Specifically, higher-level cortical areas predict inputs from lower-level areas  
24 through top-down connections, and prediction-error signals are generated to update the  
25 predictions through bottom-up connections when the predicted and actual sensory inputs

1 differ. The theory has been applied to explain how atypical internal models are created in  
2 ASD [24,25]. Experimentally, prediction-error signals have been probed by surprise  
3 responses when expected stimuli are replaced or omitted. One example is the mismatch  
4 negativity (MMN), a late responses to unexpected oddball stimuli in electroencephalography  
5 (EEG), which have been reported to show different amplitudes between ASD and typical-  
6 developing individuals [26–28]. Different surprise responses in ASD have also been observed  
7 in early EEG components [28,29] and blood-oxygen-level-dependent (BOLD) signals [30].  
8 However, meta-analyses on these reports revealed no consistent trend in these differences  
9 [31,32].

10

11 We hypothesize that the heterogeneous behavioral and neural evidence is caused by a diverse  
12 combination of erroneous predictive-coding computations occur across cortical hierarchies,  
13 thus cannot be identified by a single neural representation, such as MMN, where prediction-  
14 error signals across all hierarchies are mixed together. To test this hypothesis, we extract  
15 prediction-error signals across hierarchies and examine their atypical characteristics in ASD.  
16 To assess multi-level predictive coding , we use a local-global auditory oddball paradigm,  
17 where the subject passively listens to tone sequences with the temporal regularities  
18 established at two hierarchical levels [33]. This paradigm allowed a separation of hierarchical  
19 prediction-error signals [34–39]. To acquire large-scale neuronal dynamics in ASD with  
20 millisecond resolution, we combine high-density hemisphere-wide electrocorticography  
21 (ECoG) [40] with a marmoset model of ASD that showed similar functional and molecular  
22 features as in human ASD [41]. To provide a mechanistic quantification of erroneous  
23 predictive coding, we use a hierarchical predictive-coding model that was previously used to  
24 disentangle prediction and prediction-error signals across hierarchies and quantify the  
25 integrity of prediction at each hierarchy [42].

1

2 Our results reveal sensory hypersensitivity and highly-variable predictions in the autistic  
3 animals, which demonstrates the coexistence of the two primary Bayesian accounts of ASD:  
4 overly-precise sensory observations and weak prior beliefs. Furthermore, we find distinct  
5 patterns of underestimation and/or overestimation of the sensory regularities at different  
6 hierarchies in the autistic animals, supporting our hypothesis of erroneous hierarchical  
7 predictions as a source of ASD heterogeneity. Our findings map computational theories to  
8 their neural implementations and provide a potential neural marker for ASD that is multi-  
9 level, high-resolution, and mechanistic.

10

11

1 **Results:**

2 **Local-Global Auditory Oddball Paradigm to Establish Hierarchical Regularities**

3 Five marmosets, identified as Ji, Rc, Yo, Ca, and Rm, were used in this study. Among those,  
4 Ca and Rm were prenatally exposed to valproic acid (VPA) (see Methods), which was  
5 previously used to create a non-human model of ASD [41]. Among 9 VPA-exposed and 10  
6 non-exposed (UE) marmosets in our breeding colony, Ca showed salivary cortisol and  
7 diurnal activity levels 1.7 times higher than the average, with a T-score of 69 (n= 19  
8 animals). High cortisol levels and high diurnal activity are characteristic of VPA-exposed  
9 marmosets [43], and Ca was considered a model marmoset that is sufficiently exposed to  
10 VPA to reproduce ASD. Rm had a twin brother, named Ba, who, according to his breeders,  
11 was the least attached to his parents of the more than 200 UE and VPA-exposed marmosets  
12 they had raised. Avoidance of parents is a characteristic behavior of ASD. Rm, as Ba, would  
13 have been exposed in utero to enough VPA to reproduce ASD.

14

15 During the task, subjects were seated with the head fixed and passively listened to a series of  
16 short tone sequences based on the local-global auditory oddball paradigm (Figure 1A).  
17 Cortical activity was recorded with a 96-channel ECoG array covering nearly an entire  
18 cortical hemisphere (left hemisphere for Ji, Ca, and Rm, and right hemisphere for Rc and Yo)  
19 (Figure 1B). For Rm, 5 channels in the orbital frontal area and 3 channels in the temporal  
20 area were surgical removed during the implantation due to tissue adhesions (88 channels  
21 remained). Moreover, the data were collected at different institutes, each with a different data  
22 acquisition system, where Ji and Rc from one institute and Yo, Ca, and Rm from the other  
23 (see Methods).

24

1 During each trial, a series of 5 tones were delivered (Figure 1A). The first 4 tones were  
2 identical, either low-pitched (tone A) or high-pitched (tone B) (jointly denoted as the  
3 standard tone x), and the fifth tone could be either the same (tone x) or different (jointly  
4 denoted as the deviant tone y). This resulted in two types of sequences: xx sequence  
5 (AAAAA or BBBBB) and xy sequence (AAAAB or BBBBA). Tone sequences were  
6 delivered in blocks of 100 trials, where two types of blocks were used: xx or xy blocks. In the  
7 xx block, 20 xx sequences were initially delivered as a standard sequence to habituate the  
8 subject; then there was a random mixture of 64 xx sequences (the trial type is denoted by  
9 xx|xx: xx sequence in xx block) randomly mixed with 16 xy sequences (xy|xx: xy sequence  
10 in xx block). Conversely, in the xy block, 20 xy sequences were initially delivered as a  
11 standard sequence, followed by a random mixture of 64 xy sequences (xy|xy: xy sequence in  
12 xy block) and 16 xx sequences (xx|xy: xx sequence in xy block).

13

14 This paradigm was designed to establish two levels of temporal regularity. A local regularity  
15 is established within a trial by the repetition of the first 4 tones, which is either followed or  
16 violated by the fifth tone. A global regularity is established by habituating the subject to a 5-  
17 tone sequence, which is either followed or violated by subsequent sequences. Local and  
18 global regularities are orthogonally varied, yielding four trials types: local and global  
19 standards (xx|xx), local and global deviants (xy|xx), local deviant but global standard (xy|xy),  
20 and local standard but global deviant (xx|xy).

21

## 22 **Deviant Responses to Local and Global Regularity Violations**

23 To examine the effect of VPA on how the local and global regularities were learned and  
24 represented in the brain, we evaluated the deviant responses in the brain when the regularities  
25 were violated. We compared ECoG signals from the xy and xx sequences in both the xx and

1 xy blocks, i.e.  $xy|xx - xx|xx$  and  $xy|xy - xx|xy$ . By contrasting  $xy|xx$  and  $xx|xx$  trials, we can  
2 isolate deviant responses that arise when both local and global regularities are violated, i.e. a  
3 local deviant response that is also unpredicted by the global rule. Similarly, by contrasting  
4  $xy|xy$  and  $xx|xy$  trials, we can capture the local deviant response that is predicted by the  
5 global rule.

6  
7 To analyze the large-scale ECoG data, we first identified signal sources over the 96  
8 electrodes (or 88 in Rm) by independent component analysis (ICA) (see Methods). Each  
9 independent component (IC) represented a cortical area with statistically-independent source  
10 signals (see examples of ICs from Ji in Figure 2A). ICA could identify reference signals (e.g.  
11 IC 1 in Figure 2A) and allowed us to bypass re-referencing procedure, such as common  
12 averaging re-referencing, which could create substantial bias across all electrodes [Refs].  
13 Furthermore, ICA could help identify spatially-overlapped signal sources (e.g. ICs 59 and 89  
14 in Figure 2A), and extract artifacts (e.g. IC 96 in Figure 2A). Therefore, our further analysis  
15 was performed based on individual ICs, instead of individual channels.

16  
17 The spatio-spectro-temporal dynamics of ECoG signals were quantified by the event-related  
18 spectral perturbation (ERSP) measured in decibel (dB) (with the baseline from 300 to 0ms  
19 before the onset of the first tone, see Methods). Each ERSP represents the in-trial cortical  
20 dynamics from an IC, during the time from 300ms before the first tone to 900ms after the  
21 fifth tone (a total of 600 time bins), across the frequencies between 0 and 150Hz (a total of  
22 150 frequency bins). Examples of ERSP for all four trial types and their contrasts are shown  
23 in Figure 2B for IC 58 (located in the anterior temporal lobe) and in Figure 2C for IC 65  
24 (located in the dorsal prefrontal cortex). A deviant response was defined as a significant  
25 difference in ERSP, detected by a nonparametric cluster-based permutation test ( $\alpha = 0.05$ )



1 corrected for multiple comparisons, two-sided, see Methods). An IC that showed deviant  
2 responses in  $xy|xx - xx|xx$  or  $xy|xy - xx|xy$  was identified as a *significant IC*. For example,  
3 IC 58 was a significant IC with deviant responses in both contrasts (Figure 2B), while IC 65  
4 was not (Figure 2C). The numbers of significant ICs identified in Ji, Rc, Yo, Ca, and Rm  
5 were 5, 3, 4, 4, and 5, respectively. All the significant ICs are shown in Figure 3.

## 7 **Univariate Analysis on Deviant Responses**

8 To compare significant ICs among subjects, we first performed an univariate analysis to  
9 quantify their spatial, temporal, and spectral characteristics. To visualize the spatial  
10 distribution of each significant IC, its spatial coefficients were normalized to values between  
11 0 and 1 by calculating their absolute values and then dividing them by the maximum (as  
12 shown in Figure 3). For each subject, the normalized spatial coefficients were then averaged  
13 across all significant ICs to obtain a joint topographic map (Figure 4A), from which we  
14 evaluated the relative contributions of three cortical areas: the posterior temporal cortex  
15 (pTC), the anterior temporal cortex (aTC), and the anterior prefrontal cortex (aPFC) (Figure  
16 4B). The brain areas were identified based on the Marmoset 3D brain atlas Brain/MINDS  
17 NA216 [44] (see Methods). For each area, the relative contribution was quantified by the sum  
18 of the spatial distribution in the area divided by the total spatial distribution across all  
19 channels. For all subjects except Rm, the relative contributions from strong to weak were  
20  $pTC > aTC > aPFC$ . For Rm, the contribution in aPFC was 22.0%, which was 2.6 times  
21 stronger than the other subjects ( $8.6 \pm 2.0\%$ ,  $n=4$  subjects).

22  
23 To visualize the temporal and spectral distributions of significant ICs in each subject,  
24 absolute values of the deviant responses were averaged across all significant ICs to obtain a  
25 joint time-frequency representation (Figure 4C). By averaging the joint deviant response

1 across frequency bins, the peak responses after the last tone were found with comparable  
2 latencies of 67, 57, 80, 70, and 80ms for Ji, Rc, Yo, Ca, and Rm, respectively (Figure 4D).  
3 By averaging the joint deviant response across time points, the average frequencies were  
4 found in the high gamma band at 92, 122, 77, and 75Hz for Ji, Rc, Yo, and Ca, respectively,  
5 and in the low gamma band at 37Hz for Rm (Figure 4E).  
6  
7 We further evaluated the size of the deviant responses by measuring the maximal and  
8 minimal contrast values in the deviant responses across significant ICs (Figure 4F). For all  
9 subjects, the maximal contrast values for contrast  $xy|xx - xx|xx$  were positive and greater  
10 than the maximal contrast values for  $xy|xy - xx|xy$ . This was consistent with the view that a  
11 greater surprise was evoked when both local and global regularities were violated (captured  
12 by  $xy|xx - xx|xx$ ), while a smaller surprise was evoked when the local deviant was predicted  
13 by the global rule (captured by  $xy|xy - xx|xy$ ). Furthermore, VPA-exposed Ca and Rm  
14 showed stronger deviant responses than the unexposed Ji, Rc, and Yo. On the other hand, the  
15 minimal contrasts values were found to be positive, except in Rm where negative deviant  
16 responses were found in  $xy|xy - xx|xy$ . This is also shown in Figure 3, where a power  
17 decrease in the beta/gamma bands (20~60Hz) was observed in Rm for ICs 21, 52, and 53,  
18 particularly in  $xy|xy - xx|xy$ . To further examine the ERSP for those ICs, stronger responses  
19 to the last x tone in  $xx|xy$  were observed (Figure 4G). This indicated a strong surprise toward  
20 the global deviant (last tone x), which was not observed in other subjects (e.g. see IC 58 in Ji  
21 in Figure 2B), and suggested that Rm was more sensitive to the violation of the global rule.  
22  
23 The univariate analysis revealed some abnormal characteristics in the deviant responses in Ca  
24 and Rm. In summary: (1) VPA-exposed Ca and Rm showed stronger deviant responses than  
25 the unexposed, suggesting their hypersensitivity to deviant stimuli; (2) hyperactivity in the

1 prefrontal cortex was found in Rm, not Ca, which could link to its hypersensitivity to the  
2 global regularity; (3) high-gamma deviant responses, which were thought to represent  
3 bottom-up prediction errors, were absent in Rm.

4

### 5 **A Hierarchical Predictive Coding Model for the Local-Global Paradigm**

6 To further investigate how sensory sensitivity and erroneous predictions could lead to the  
7 observed abnormal deviant responses, we used a model-fitting analysis based on a  
8 quantitative model of hierarchical predictive coding. The quantitative model can explain the  
9 brain responses during the local-global paradigm with a goodness-of-fit closed to the optimal  
10 data-driven decomposition, and enable a mechanistic evaluations of the underlying sensory  
11 sensitivity and prediction strengths at the local and global levels [42].

12

13 The model describes the interactions between prediction and prediction-error signals during  
14 the last tone of a sequence after both local and global regularities are learned. It consists of  
15 three hierarchical levels (Level S, Level 1, and Level 2) and two streams (x stream and y  
16 stream). Level S is the sensory level that receives thalamic input, which was a value between  
17 0 and 1, Level 1 learns and encodes the local regularity, which is the tone-to-tone transition  
18 probability (TP), and Level 2 learns and encodes the global regularity, which is the sequence  
19 probability (SP). The x and y streams process the tone x and y, respectively.

20

21 Figure 5A shows the neural operations in the x stream between Levels S and 1. Level S  
22 contains a neuronal population (denoted by  $x_s$ ) that receives a sensory input (black arrow) and  
23 a prediction signal (green arrow) from Level 1, and sends a prediction-error signal (blue  
24 arrow) to Level 1. Level 1 contains a neuronal population ( $x_1$ ) that receives the prediction-  
25 error signal from Level S, and sends a prediction signal to Level S. If we assume that the

1 strengths of the sensory input and the prediction signal are 1 and  $PI_x$  ( $0 \leq PI_x \leq 1$ ),  
2 respectively, then there are two possible situations: (1) if the last tone is x, then the strength  
3 of the prediction-error signal is  $1 - PI_x$ , (2) if the last tone is not x, then the prediction error is  
4  $0 - PI_x$  (a negative value) and the strength of the corresponding prediction-error signal is  $|0 -$   
5  $PI_x| = PI_x$  ( $|\cdot|$  indicates the absolute value). Absolute values are taken because we assume  
6 predictions and prediction errors are encoded in neuronal firing rates [45], which can only  
7 have non-negative values. Thus, the prediction-error signal received during the last tone at  
8 Level 1 in the x stream (denoted as  $PE1_x$ ) is either  $1 - PI_x$  or  $PI_x$ , where the probability of  
9 receiving the former is the transition probability from tone x to x ( $TP_x$ ) and the probability of  
10 receiving the latter is  $1 - TP_x$  (see the bar graph in Figure 5A).

11

12 Figure 5B shows the neural operations in the x stream between Levels 1 and 2. Similar to  
13 Level 1, Level 2 contains a neuronal population ( $x_2$ ) that receives the prediction-error signal  
14 from Level 1, and sends a prediction signal  $P2_x$  to Level 1. If the sequence is xx, then the  
15 prediction-error signal received at Level 1 is  $1 - PI_x$  (since Level S receives tone x) and the  
16 prediction-error signal received at Level 2 is  $|1 - PI_x - P2_x|$ . If the sequence is not xx, then  
17 the prediction-error signal received at Level 1 is  $PI_x$  (since Level S receives not x) and the  
18 prediction-error signal received at Level 2 is  $|PI_x - P2_x|$ . Thus, the prediction-error signal  
19 received during the last tone at Level 2 in the x stream (denoted as  $PE2_x$ ) is either  $|1 - PI_x -$   
20  $P2_x|$  or  $|PI_x - P2_x|$ , where the probability of receiving the former is the sequence probability  
21 of sequence xx ( $SP_{xx}$ ) and the probability of receiving the latter is  $1 - SP_{xx}$ .

22

23 Based on the model, the strengths of the prediction signals (e.g.  $PI_x$  and  $P2_x$  in the x stream)  
24 are to minimize the mean-squared error received at that level, and can be determined once the  
25 transition and sequence probabilities are known (see Methods). Figure 5C shows the

1 complete model for the xx and xy sequences in the xx and xy blocks, which includes the  
2 values of prediction and prediction-error signals at both the local and global levels in both the  
3 x and y streams. Note that the same prediction signals appear for both the xx and xy  
4 sequences, since predictions occur before the last tone arrives. Furthermore, even though the  
5 x and y tones are processed in separate streams based on the tonotopic organization, two  
6 streams need to integrate information at Levels 1 and 2 to compute transition probabilities  
7 ( $TP_x$  and  $TP_y$ ), and sequence probabilities ( $SP_{xx}$  and  $SP_{xy}$ ), respectively. In Figure 5C, we  
8 indicate these integrations for probability computations as horizontal gray bars between  
9 populations  $x_1$  and  $y_1$  and between populations  $x_2$  and  $y_2$ .

10

11 The deviant responses in  $xy|xx - xx|xx$  and  $xy|xy - xx|xy$  then can be calculated for the x and  
12 y streams by subtracting the model values for the xx sequence from those for the xy sequence  
13 in each block (Figure 5D). Note that only the prediction-error signals were left in the deviant  
14 responses since the same prediction signals are shared between xx and xy sequences.

15 Furthermore, even though x and y streams are modeled separately, their prediction-error  
16 values were combined for later model-fitting (Figure 5E). This is based on the assumption  
17 that ECoG recordings offer insufficient spatial resolution to separate the x and y streams. As  
18 results, the local prediction error (PE1) and global prediction error (PE2) contained the  
19 deviant responses are 1.50 and 0.88, respectively in  $xy|xx - xx|xx$ , and are 1.14 and -0.70,  
20 respectively in  $xy|xy - xx|xy$ .

21

## 22 **Models with Erroneous Sensory Sensitivity and Hierarchical Predictions**

23 The model values shown in Figures 5C-5E represent the optimal predictions, where the  
24 mean-squared prediction errors are minimized at each level. To further evaluate the potential

1 erroneous sensory sensitivity and predictions for the VPA-exposed, we further added some  
2 tunings to the model across different levels (Figure 5F).  
3  
4 At Level S, a scaling factor  $s_0$  was added to the sensory input in the x stream to account for  
5 the sensory sensitivity or adaptation for the repetitive tone x. The value of  $s_0$  was between 0  
6 and 1, where  $s_0=1$  represents no sensory adaptation or no diminished responses to repeated  
7 exposure of tones. For the xy sequence, since tone y does not repeat, adaption does not occur  
8 in the y stream. At Levels 1 and 2, we added scaling factors  $s_1$  and  $s_2$  to the first-level  
9 predictions ( $PI_x$  and  $PI_y$ ) and the second-level predictions ( $P2_x$  and  $P2_y$ ), respectively, to  
10 account for imperfect predictions. When  $s_1=1$  and  $s_2=1$ , the predictions are optimal. When  
11  $s_1<1$  or  $s_2<1$ , the prediction underreacts to the input (sensory input or first-level prediction  
12 error, respectively), i.e. “hypo-prediction”, and is insufficient to cancel it out. For example, if  
13  $s_1=0$ , there will be no first level prediction, and the prediction errors continue to propagate to  
14 Level 2 without reducing. When  $s_1>1$  or  $s_2>1$ , the prediction overreacts to the input, i.e.  
15 “hyper-prediction”, where the corresponding transition or sequence probabilities are  
16 overestimated and additional errors are created. Note that  $s_1$  and  $s_2$  were applied to both the x  
17 and y streams, since erroneous estimation of transition or sequence probabilities could occur  
18 at both streams. In Figure 5G, we show an example of PE1 and PE2 contained in the deviant  
19 responses in the xx and xy blocks under different combinations of  $s_1$  (between 0 and 2) and  $s_2$   
20 (between 0 and 2) when  $s_0=1$  (no sensory adaptation).

21

## 22 **Model-Fitting for Optimal Decomposition of Deviant Responses**

23 We then evaluated which combination of  $s_0$ ,  $s_1$ , and  $s_2$  could best explain the observed  
24 deviant responses. To achieve this, we first pooled all deviant responses (as shown in Figure  
25 3) to create a tensor with three dimensions: *Contrast*, *IC*, and *Time-Frequency* for the

1 functional, anatomical, dynamical aspects of the data, respectively. For each subject, the  
2 dimensionality of the tensor was 2 (xy|xx – xx|xx and xy|xy – xx|xy) by 3~5 (the number of  
3 significant ICs) by 90,000 (600 time points and 150 frequency bins).

4  
5 We then factorized the 3D tensor into PE1 and PE2 components by performing parallel factor  
6 analysis (PARAFAC), a generalization of principal component analysis (PCA) to higher-  
7 order arrays [46], with the first dimension fixed with the model values (see Methods). This  
8 model-fitting analysis was performed for 9,261 (= 21\*21\*21) models, each with a unique  
9 combination of the scaling factors  $s_0$  (21 values between 0 and 1),  $s_1$  (21 values between 0  
10 and 2), and  $s_2$  (21 values between 0 and 2). For each model, the goodness-of-fit was  
11 evaluated by the residual sum of squares (RSS) and core consistency [47]. The best-fitting  
12 model was determined as the one with the smallest RSS and a core consistency above 80%.

13  
14 The parameters of the best-fitting models for all subjects are shown in Figure 6. The best-  
15 fitting models for the unexposed (Ji, Rc, and Yo) were found with similar scaling factors:  $s_0 =$   
16 0.35~0.45,  $s_1 = 0.8\sim 0.9$ , and  $s_2 = 0.7\sim 0.8$ . For VPA-treated, the best-fitting model for Ca was  
17 found when  $s_0 = 0.75$ ,  $s_1 = 0.3$ , and  $s_2 = 0.2$ . This suggested a hyper sensory sensitivity ( $s_0$  was  
18 twice the size as for the unexposed) and hypo-predictions at both the local and global levels.  
19 On the other hand, the best-fitting model for Rm was found when  $s_0 = 0.95$ ,  $s_1 = 1.0$ , and  $s_2 =$   
20 1.72. This indicated that Rm shared a similar hyper sensory sensitivity as in Ca, but with a  
21 normal local prediction and a hyper global prediction.

22  
23 In summary, the model-fitting analysis revealed potential mechanisms that cannot be  
24 observed by univariate analysis, and indicated that (1) predictions in the unexposed were  
25 close to optimal at both hierarchical levels, (2) hyper sensory sensitivity was found in both

1 VPA-treated, and (3) different types of erroneous hierarchical predictions were observed for  
2 VPA-treated.

3

#### 4 **Prediction-Error Signals Extracted From Best-Fitting Models**

5 Next we visualized the spatio-spectro-temporal patterns of the PE1 and PE2 components  
6 extracted from the best-fitting models. These components were visualized by their  
7 composition in the three tensor dimensions. The first dimension showed how much PE1 and  
8 PE2 contributed to the deviant responses in the two contrasts (Figure 7A), which was  
9 determined by the model and used for the model-fitting. The model values were different  
10 across subjects, since different optimal parameters were obtained.

11

12 The second dimension showed the contribution of each significant IC to PE1 and PE2 (Figure  
13 7B). For example, in Ji, only ICs 58, 69, and 94 contributed to PE1, and IC 69 contributed the  
14 most. To further visualize these contributions on a brain map, the normalized spatial  
15 distributions of significant ICs (as in Figure 3) were combined based on their contributions  
16 (see more details in Methods). The resulting brain maps are shown in Figure 7B. Overlaps  
17 between PE1 and PE2 were observed for most subjects, but primarily PE1 appeared in the  
18 posterior temporal cortex and PE2 appeared in the anterior temporal cortex and the anterior  
19 prefrontal cortex. This propagation of prediction errors from the temporal cortex to the  
20 prefrontal cortex is consistent with previous evidence from both monkey and human studies  
21 using the local-global paradigm or its variations [33–36,39].

22

23 The third dimension showed the in-trial spectro-temporal dynamics for PE1 and PE2 (Figure  
24 7C). To examine the temporal dynamics of PE1 and PE2, we averaged the time-frequency  
25 representation in Figure 7C across all frequency bins (Figure 7D). PE1 peaked at 47, 53, 80,



1 67, and 37msec after the last tone, while PE2 peaked later at 93, 93, 133, 100, and 103msec  
2 for Ji, Rc, Yo, Ca, and Rm, respectively. To examine the spectral profiles of the PE1 and PE2  
3 components, we measured their maximal activation at each frequency bin across all time bins  
4 (Figure 7E). The average frequencies were 97, 112, 81, 95, and 30Hz for PE1, and 100, 121,  
5 90, 64, and 41Hz for PE2 in Ji, Rc, Yo, Ca, and Rm, respectively. The high-gamma  
6 components were absent in Rm, as described in Figure 4E.

7

### 8 **Response Variability Underlying Deviant Responses**

9 For Rm, the absence of high-gamma components in the deviant responses could result from  
10 two possibilities: (1) the sizes of prediction-error signals carried in the high-gamma band  
11 were comparable between the xx and xy sequences, or (2) the sizes of prediction-error signals  
12 were different between the xx and xy sequences but the trial-to-trial variability was too high  
13 to obtain statistical significance. The former suggests that no prediction was established, and  
14 the latter suggests that the prediction was highly variable over trials.

15

16 To test these two possibilities, we measured the trial-by-trial sizes of PE1 and PE2 by  
17 evaluating how much PE1 and PE2 contributed to single-trial EEG responses. This was  
18 achieved by projecting the single-trial EEG responses onto the spatio-spectro-temporal  
19 structures of PE1 and PE2. The spectro-temporal structures of PE1 and PE2 were determined  
20 by normalizing the corresponding time-frequency representations (as in Figure 7C) to values  
21 between 0 and 1 and then averaged across subjects (Figure 8A). A mask in the high-gamma  
22 band was determined as the top 75% values in frequencies above 40Hz (red contour in Figure  
23 8A). The single-trial contributions of PE1 and PE2 were then obtained by projecting single-  
24 trial EEG responses of each significant IC onto these masks. For each trial, the projection  
25 values were averaged, weighted by the spatial contributions (as in Figure 7B), and resulted in

1 two projection values to describe how much PE1 and PE2 appeared in the high-gamma band  
2 (see details in Methods). An example of the projection values is shown in Figure 8B.

3

4 For each trial type, the mean, standard deviation, and coefficient of variance (CV, the  
5 standard deviation divided by the mean) of the projection values are shown in Figure 8C. The  
6 mean activations were higher in Ca compared to the unexposed for both PE1 and PE2, while  
7 the means in Rm were comparable to the unexposed. The high mean values in Ca were  
8 consistent with the findings that Ca had high sensory sensitivity and the subsequent high  
9 prediction errors were not adequately explained away due to hypo-predictions. Furthermore,  
10 Ca and Rm showed high standard deviations for both PE1 and PE2. In Rm, the high standard  
11 deviation with the comparable mean led to high CV, which supported the second possibility  
12 that the absence of the high-gamma components was resulted from highly-variable  
13 predictions. In Ca, the high standard deviation was compensated by the high mean activation,  
14 which led to low CV and the significant high-gamma components. In addition, PE1 and PE2  
15 were both greater in xy|xx than in xx|xx in all subjects, which was consistent with the view  
16 that the xy sequence generated greater local and global prediction errors than the xx sequence  
17 in the xx block. To further demonstrate high standard deviations in Ca and Rm, we measured  
18 the probability distributions of the projection values for PE1 and PE2 for each trial type and  
19 subject (Figure 8D). Wider distributions were found in Ca and Rm, suggesting that the  
20 predictions and their subsequent prediction errors in both subjects were highly-variable at  
21 both the local and global levels.

22

## 1 **Discussion:**

2 We combine a passive auditory paradigm with a quantitative model to extract the neural  
3 signatures of hierarchical prediction-error signals, and evaluate the integrity of predictive  
4 coding in VPA-exposed animals. Through this approach, we unveil both sensory  
5 hypersensitivity and unstable predictions in VPA-exposed animals. Notably, these fluctuating  
6 predictions present distinct patterns of underestimation and/or overestimation of hierarchical  
7 sensory regularities, potentially contributing to the diverse characteristics of ASD. By linking  
8 computational theories with their neural underpinnings, our study lays the groundwork for  
9 identifying a comprehensive, multi-tiered, and mechanistic neural marker for ASD.

10

## 11 **Similar neural signatures among macaques, humans, and marmosets**

12 The hierarchical organization of prediction-error signals in the auditory local-global  
13 paradigm has been examined in humans and non-human primates [35–39,48]. Utilizing both  
14 data-driven and model-driven analyses to decompose predictive-coding signals that are not  
15 only interdependent but also spatially and temporally overlapping, we have identified the  
16 neural signatures of local and global prediction-error signals in macaque ECoG [34] and  
17 human EEG [42]. The spatio-spectro-temporal markers observed in both macaques and  
18 humans bear similarity to those depicted in Figure 7, showing prediction-error signals in high  
19 frequency band (>30Hz) propagating from the auditory cortex to the frontal cortex with a  
20 delay of ~50msec. This suggests a shared neural organization that facilitates hierarchical  
21 predictive coding in both human and non-human primates. Moreover, it indicates the  
22 potential applicability of our animal model findings to human patients.

23

## 24 **Multi-level regularity processing in individuals with ASD**

25 The local-global paradigm has been utilized to study atypical perception and emotion

1 processing in ASD. In a study of adults with ASD, a smaller MMN was found in the ASD  
2 group than in the typically developing (TD) group [27]. Moreover, both groups demonstrated  
3 a reduced MMN when the global rule could be anticipated, such as in the xy block, but this  
4 reduction was more pronounced in the TD group than in the ASD group. This implies weaker  
5 local and global predictions among individuals with ASD. In a study with children (8~15  
6 year old) with ASD, no significant differences in MMN were found between ASD and TD  
7 groups, suggesting that local prediction error was processed normally [26]. When  
8 manipulating the global rule to establish various levels of expectation for local deviants,  
9 children with ASD responded differently. There was a decrease in frontocortical responses to  
10 sequences that were unexpected, whereas there was an increase in late frontal activation in  
11 response to anticipated sequences. These findings suggest that there may be abnormalities in  
12 global prediction within the ASD population. In addition, individuals with ASD demonstrated  
13 MMN in response to violations of local emotion regularity for both faces and music, but their  
14 responses to global emotion regularity violations were absent [49]. These results, derived  
15 from a group level analysis, suggest a potential deficiency in global prediction within ASD.  
16 They are in alignment with other discoveries of unusual contextual modulations in sensory  
17 processing in ASD, observed in both non-social settings [50,51] and social contexts [52–54].  
18 However, our results demonstrate the importance of conducting an individual-level analysis,  
19 which would help in identifying the potential diversity in abnormalities in multi-level  
20 regularity processing.

21

## 22 **Sensory hypersensitivity and aberrant precision control in ASD**

23 Our findings indicate that the VPA-exposed animals exhibited elevated  $s_0$  values, suggesting  
24 that their responses to repetitive stimuli were not as significantly reduced compared to the  
25 healthy controls. We interpretate this lack of sensory adaption as heightened sensory

1 sensitivity, and use this evidence to support the overly-precise sensory observations account  
2 of ASD [7–9]. However, sensory hypersensitivity can also be attributed to imbalanced  
3 precision controls, where the brain faces challenges in prioritizing sensory information based  
4 on its perceived reliability or precision [10,13,14]. In this case, there is a tendency to assign  
5 higher weight to low-level sensory details, potentially intensifying the sensitivity to sensory  
6 stimuli. Importantly, these theories are not mutually exclusive and can provide  
7 complementary insights into the understanding of sensory processing in ASD. To gain a  
8 deeper understanding of their respective contributions, employing a trial-by-trial analysis  
9 with Bayesian modeling that incorporates precision parameters could be beneficial [55,56].  
10 Additionally, conducting experiments that effectively control the precision of stimuli can  
11 provide valuable insights into the interplay between sensory processing and precision  
12 weighting [57].

13

14 It is worth noting that our model does not differentiate the origins of this presumed sensory  
15 adaption to repetitive stimuli, only its outcome. One possible cause is stimulus-specific  
16 adaptation, an inhibitory neuronal mechanism observed in both cortical and subcortical  
17 structures [58–60]. Another possible cause is predictive coding itself, where the prediction of  
18 transitions between identical tones is learned during repetitions, and the repetitive tones  
19 generate less surprise over time. To fully explain the data will require a model that includes  
20 the interplay between and stimulus-specific adaptation and predictive coding to describe the  
21 neural dynamics during each tone in both cortical and subcortical areas.

22

### 23 **Atypical perceptual learning in ASD**

24 Our findings demonstrate erroneous predictions across different cortical hierarchies in VPA-  
25 exposed animals. This implies a deficiency in perceptual learning, which is a key

1 characteristics of the ASD phenotype [61]. This deficiency could stem from abnormalities in  
2 synaptic plasticity [62] or learning-related changes in neural connections [63], and lead to  
3 slow or irregular belief updates [11,12]. Regrettably, our current model has limitations in  
4 assessing the learning process as it only represents the signals once the temporal regularities  
5 have already been learned and the errors have been minimized. To understand the dynamic  
6 process of prediction updating and error minimization, it is crucial to investigate the trial-by-  
7 trial signaling that occurs during the learning process.

8

9 A Bayesian model known as the hierarchical Gaussian filtering (HGF) has emerged as a  
10 promising candidate for understanding prediction updating and error minimization [64]. This  
11 model employs precision-weighted prediction errors [20,22,65] and has been utilized to  
12 investigate prediction-error signals in the brain during learning [66–70]. However, its current  
13 implementation is limited in terms of hierarchical prediction, despite the term "hierarchical"  
14 in its name, which primarily refers to a motor aspect of the model. Nevertheless, there is a  
15 high demand for further development and application of hierarchical prediction within this  
16 model. Another candidate is dynamic causal modeling (DCM), which is also a Bayesian  
17 model that can be used to estimate the coupling among brain regions and the changes in  
18 coupling over time and across experimental conditions [71]. This method has been utilized in  
19 studying MMN [55,72,73], albeit with the constraint that the brain regions of interest had to  
20 be predetermined.

21

## 22 **Non-human primate model of ASD**

23 The phylogenetic closeness between nonhuman primates and humans, particularly in  
24 molecular, circuitry, and morphological features of the brain, has made these species  
25 increasingly attractive as novel models of psychiatric disorders. Boasting a well-

1 differentiated frontal lobe and intricately stratified hierarchical cortical connectivity, their  
2 cerebral cortex closely resembles that found in humans [74]. Marmosets, in particular, offer  
3 many advantages as model organisms for the developmental disorder autism. For example,  
4 early sexual maturation, high reproductive rates, efficient space utilization due to their  
5 compact size, the potential for genetic manipulation, and a complex repertoire of social skills  
6 [75].

7  
8 The VPA-exposed model marmosets utilized in this study show deficits in social tasks that  
9 require sophisticated and hierarchical internal models [76,77]. This includes the ability to  
10 adjust one's motivation based on observations of others' behavior and to evaluate the  
11 reciprocity of others. It is important to note that gene expression within the marmoset cortex  
12 closely matches the postmortem brains of human ASD, suggesting that it more closely  
13 resembles humans than any prior rodent model [41]. Notably, gene expression associated  
14 with myelin and inhibitory neurons, which are thought to be important for brain computation,  
15 is commonly reduced in both individuals with ASD and the VPA-exposed marmosets.  
16 Continued studies of hierarchical predictive coding using the VPA-exposed marmosets may  
17 provide important insights into the nature of human ASD. This is especially important given  
18 the profound social deficits exhibited in ASD.

19  
20 In summary, we record large-scale high-resolution neural data in a non-human primate model  
21 of ASD and identify different neural signatures underlying different predictive coding  
22 accounts of ASD. This research has the potential to contribute to the identification of neural  
23 markers specific to different subtypes of ASD and shed light on the impact of prenatal VPA  
24 exposure on neurodevelopmental pathways leading to ASD.

25

1 **Methods:**

2

3 **Animals:**

4 We used five adult common marmosets (*Callithrix jacchus*; three males and two females,  
5 320–450 g, 22–42 months). Before the ECoG arrays were implanted into the monkeys, they  
6 were familiarized with the experimenter and experimental settings. The animals had ad  
7 libitum access to food and water throughout the experimental period. Two animals (Ji and  
8 Rc), were raised and recorded at RIKEN Center for Brain Science, and the other three  
9 animals (Yo, Ca, and Rm), were raised and recorded at the National Center of Neurology and  
10 Psychiatry (NCNP). Marmosets were housed in an environment maintained on a 12/12-hour  
11 light/dark cycle, and given food (CMS-1, CLEA Japan) and water ad libitum. Temperature  
12 was maintained at 27-30°C and humidity at 40-50%.

13

14 All procedures of the ECoG study at RIKEN were conducted in accordance with a protocol  
15 approved by the RIKEN Ethical Committee. All procedures of the VPA preparation and  
16 ECoG study at NCNP were conducted in accordance with NIH guidelines and the "Guide for  
17 the Care and Use of Primate Laboratory Animals" published by the National Institute of  
18 Neurological Research, National Center of Neurology and Psychiatry, and approved by the  
19 Animal Research Committee of NCNP.

20

21 **VPA treatment:**

22 The method for producing VPA-exposed marmosets was identical to the one detailed in our  
23 previous work [41]. In short, serum progesterone levels in the female marmosets were  
24 monitored once a week to determine the timing of pregnancy. In addition to the blood  
25 progesterone level, pregnancy was further confirmed by palpitations and ultrasound



1 monitoring (Ultrasound Scanning; Xario, Toshiba Medical Systems Corp., Tochigi, Japan).  
2 We orally administered 200 mg/kg of sodium valproate (VPA, Sigma–Aldrich, St. Louis,  
3 MO, USA) seven times from day 60 to 66 after conception to the mother marmosets. We did  
4 not observe obvious malformations or deformities in VPA-exposed marmosets.

5

#### 6 **Electrode implants:**

7 The whole-hemisphere 96-channel ECoG arrays (Cir-Tech Co. Ltd., Japan) were chronically  
8 implanted. We epidurally implanted the array into the right hemisphere for Rc and Yo, and  
9 the left hemisphere for Ji, Rm and Ca. Eight electrodes (channels 92~94) from Rm were cut  
10 during the implantation due to tissue adhesions. The surgical procedures for electrode  
11 implantation have been previously described in detail [40]. The coordinates of recording  
12 electrodes were identified on the basis of the combination of pre-acquired MR images and  
13 postoperative computer tomography images using AFNI software [78]  
14 (<http://afni.nimh.nih.gov>). Then, we estimated the location of each electrode on cortical areas  
15 by registering to the Marmoset 3D brain atlas Brain/MINDS NA216 [44] with AFNI and  
16 ANTS [79].

17

#### 18 **Experimental setup:**

19 ECoG signals from monkeys Ji and Rc were acquired at RIKEN using a Grapevine NIP  
20 system (Ripple Neuro, Salt Lake City, UT) at a sampling rate of 1 kHz. Experiments of  
21 monkeys Yo, Rm, and Ca were conducted at NCNP. The neural signals were stored at a  
22 1017.25 Hz sampling resolution into a TDT signal processing system RZ2 (Tucker-Davis  
23 Technologies, Alachua, FL). During the ECoG recordings, the marmoset was seated in a  
24 primate chair in an electrically shielded and sound-attenuated chamber with their head fixed.

1 The auditory stimuli were delivered bilaterally by two audio speakers (Fostex, Japan) at a  
2 distance of ~20 cm from the head at an average intensity of 65 dB SPL.

3

#### 4 **Stimuli and experimental procedure:**

5 Two tones with different pitches (Tone A = 800Hz; Tone B = 1600Hz) were synthesized.  
6 Each tone was 50 ms in duration. Series of five tones were presented with a 150 ms inter-tone  
7 interval, with 950-1150 ms was set between the offset of the last tone of a sequence and the  
8 onset of the first tone of the following sequence (see Figure 1A). Four different stimulus  
9 blocks were used: AAAAA, BBBBB, AAAAB, and BBBBA blocks. In AAAAA blocks, 20  
10 AAAAA sequences were delivered, followed by a random mixture of 64 AAAAA and 16  
11 AAAAB. In BBBBB blocks, 20 BBBBB sequences were delivered, followed by a random  
12 mixture of 64 BBBBB and 16 BBBBA. In AAAAB blocks, 20 AAAAB sequences were  
13 delivered, followed by a random mixture of 64 AAAAB and 16 AAAAA. In BBBBA blocks,  
14 20 BBBBA sequences were delivered, followed by a random mixture of 64 BBBBA and 16  
15 BBBBB. In each experimental day, we conducted ECoG recordings on 1~8 blocks,  
16 depending on the animal's condition. For each animal, we performed 7-9 recordings for each  
17 block. The ECoG data can be freely downloaded (<https://dataportal.brainminds.jp/>).

18

#### 19 **Data analysis:**

20 *Preprocessing and Independent Component Analysis (ICA):*

21 The ECoG signals were downsampled to 300Hz by EEGLAB on MATLAB [80] (function:  
22 `pop_resample.m`). Bad channels were then removed by visual inspections: channels 6, 7, 8,  
23 and 80 were removed in Rc; channels 8, 68, 71, 81, 83, 85, 87, and 88 were removed from  
24 Yo; channels 2, 44, 48, 61, 63, 64 were removed in Ca, channels 1, 6, 7, 8, 9, 10, 43, 43, 49,  
25 and 81 were removed in Rm. For each subject, all data were concatenated together, and ICA

1 was performed by the FieldTrip Toolbox [81] (function: `ft_componentanalysis.m` with the  
2 `runica` algorithm). For each trial, the ICA signals were aligned at the onset of the first tone,  
3 and signals from 0.3s before to 1.7s after the onset of the first tone were segmented and used  
4 for the further analyses.

5

6 *Event-related spectral perturbation (ERSP):*

7 For each subject, independent component (IC), and trial, the time–frequency representation  
8 of the ICA signal was generated by Morlet wavelet transformation at 150 different center  
9 frequencies (1~150Hz) with the half-length of the Morlet analyzing wavelet set at the  
10 coarsest scale of 7 samples, which is implemented in the FieldTrip Toolbox  
11 (`ft_freqanalysis.m`). Baseline normalization was then performed to calculate the decibel  
12 values by using the baseline period from –0.3 to 0s (time zero as the onset of the first tone)  
13 (`ft_freqbaseline.m`).

14

15 *Deviant response:*

16 For each subject, the deviant responses ( $xy|xx - xx|xx$  and  $xy|xy - xx|xy$ ) were calculated for  
17 each IC across all trials. To measure the significance of the difference in ERSP (as the black  
18 contours shown in Figures 2B), we performed permutations by shuffling trial indices, and  
19 used a nonparametric cluster-based method for multiple comparisons correction [82], which  
20 is implemented in FieldTrip Toolbox (`ft_freqstatistics.m` with 500 permutations). Non-  
21 significant values in the deviant responses were set to 0, and ICs with no significant deviant  
22 responses in both  $xy|xx - xx|xx$  and  $xy|xy - xx|xy$  were considered as non-significant ICs.

23

24 *Model-fitting with parallel factor analysis (PARAFAC):*

25 We used PARAFAC, a generalization of principal component analysis (PCA) to higher-order

1 arrays [46], which was previous used for the computational extraction of latent structures in  
2 functional network dynamics [34,83–85]. To decompose deviant responses into components  
3 with theorized contrast values, PARAFAC was performed with the first dimension *Contrast*  
4 fixed with the values proposed by the model. This was done by the N-way toolbox [86], with  
5 no constraint on all three dimensions (using FixMode and OldLoad inputs in parafac.m). The  
6 convergence criterion (i.e., the relative change in fit for which the algorithm stops) was set to  
7  $1e-6$ . The initialization method was set to be direct trilinear decomposition (DTLD), which  
8 was considered the most accurate method [87]. For each fitting, the residual sum of squares  
9 (RSS) and the core consistency diagnostic [47] were measured.

10

#### 11 *Brain spatial contribution:*

12 For each significant IC, the absolute values of the spatial filter ( $1 \times$  number of channels) were  
13 first calculated and normalized by their maximal value (as in Figure 3). The brain map shown  
14 in Figure 7B was the linear combination of the normalized spatial filters of all significant ICs  
15 and their contributions in the model-fitting (Figure 7B).

16

#### 17 *Single-trial projection:*

18 For each subject, a single-trial ERSP response ( $ERSP = \text{number significant ICs} \times 150$   
19  $\text{frequency bins} \times 600 \text{ time points}$ ) was projected on a PE1 or PE2 spectro-temporal mask  
20 ( $FT = 600 \text{ time points} \times 150 \text{ frequency bins}$ ) (as in Figure 8A) and the contributions of all  
21 significant ICs ( $S = 1 \times \text{number significant ICs}$ ) (as in Figure 7B). This was calculated as  
22  $S * ERSP * FT$ , which yields a single scalar value. Note that the spectro-temporal masks for  
23 PE1 and PE2 were calculated from all subjects and thus shared across subjects, while the  
24 contributions of all significant ICs were different across subjects.

25

## 1 **Model calculation:**

2 We used a simple model we previously proposed [42]. In the model, the optimal value of  
3 each prediction signal is to minimize the mean-squared error received. For example, the mean  
4 squares of  $PE1_x$  (denoted by  $MSPE1_x$ ) can be devised as (based on the bar graph in Figures  
5 5A):

$$6 \quad MSPE1_x = TP_x * (s_0^{n-1} - P1_x)^2 + (1 - TP_x) * (P1_x)^2 \quad [1]$$

7 The minimums occur when:

$$8 \quad P1_x = s_0^{n-1} * TP_x \quad [2]$$

9 And  $P1_y$  can be obtained in the same fashion:

$$10 \quad P1_y = TP_y \quad [3]$$

11 This represent the optimal prediction where first level prediction errors are minimized. Then  
12 we added the scaling factor  $s_1$  to  $P1_x$  and  $P1_y$  and calculate the mean squares of  $PE2_x$   
13 (denoted by  $MSPE2_x$ ):

$$14 \quad MSPE2_x = SP_{xx} * (|s_0^{n-1} - P1_x * s_1| - P2_x)^2 + (1 - SP_{xx}) * (P1_x * s_1 - P2_x)^2 \quad [4]$$

16 The minimums occur when:

$$17 \quad P2_x = SP_{xx} * (|s_0^{n-1} - P1_x * s_1|) + (1 - SP_{xx}) * P1_x * s_1 \quad [5]$$

18 And  $P2_y$  can be obtained in the same fashion:

$$19 \quad P2_y = SP_{xy} * (|1 - P1_y * s_1|) + (1 - SP_{xy}) * P1_y * s_1 \quad [6]$$

20 Note that the  $P2_x$  and  $P2_y$  here represent the optimal predictions when potential erroneous  
21 predictions at the first level are considered. Also,  $s_2$  was applied to calculate the second level  
22 prediction errors, i.e.  $P2_x * s_2$  and  $P2_y * s_2$  were used (as shown in Figure 5F).

23

24 Based on the model, all prediction signals are determined once the transition probabilities  
25 ( $TP_x$  and  $TP_y$ ), sequence probabilities ( $SP_{xx}$  and  $SP_{xy}$ ), and scaling factors ( $s_0$ ,  $s_1$ , and  $s_2$ ) are

- 1 known. The transition probabilities can be calculated based on the number of tones in a
- 2 sequence and the sequence probabilities (the MATLAB code for these calculations is
- 3 provided).
- 4

1 **Acknowledgements:**

2 We thank Yuri Shinomoto and Takaaki Kaneko for animal care and awake recordings;  
3 Junichi Hata for obtaining the MRI images. We also thank Dr. Wataru Suzuki for his  
4 assistance in setting up the ECoG lab system and marmoset experiments and Ms. Akiko  
5 Tsuchiya for her technical support to marmoset breeding and the creation of the VPA-  
6 exposed marmoset. This work was supported by World Premier International Research  
7 Center Initiative (WPI), MEXT, Japan (to Z.C.C.), Brain/MINDS from the Japan Agency for  
8 Medical Research and Development (JP20dm0207001 and JP20dm0207069 to M.K.), JSPS  
9 KAKENHI (JP 23H04978 to M.K.), JST Moonshot R&D (JPMJMS2294 to M.M), and an  
10 Intramural Research Grant (Nos. 23-7, 26-9, and 29-6 to N.I.) for Neurological and  
11 Psychiatric Disorders from the NCNP and AMED (JP23dm0207066 to N.I.).

12

13 **Author contributions:**

14 Z.C.C. conceptualized the study. M.K. and Z.C.C. refined the experimental protocol. M.K.  
15 coordinated and conducted ECoG experiments. K.I. and M.M. conducted ECoG experiments  
16 at NCNP. N.I. and K.N. provided VPA marmosets, including marmoset rearing. Z.C.C.  
17 designed and performed the data analysis. Z.C.C. wrote the first draft of the paper, and N.I.  
18 and M.K. helped with the editing. All authors contributed to and have approved the final  
19 paper.

20

21 **Competing interests:**

22 The authors declare no competing interests.

23

## 1 **References:**

- 2 1. Fu JM, Satterstrom FK, Peng M, Brand H, Collins RL, Dong S, et al. Rare coding variation  
3 provides insight into the genetic architecture and phenotypic context of autism. *Nat*  
4 *Genet.* 2022; 1–12. doi:10.1038/s41588-022-01104-0
- 5 2. Arunachalam Chandran V, Pliatsikas C, Neufeld J, O’Connell G, Haffey A, DeLuca V, et al.  
6 Brain structural correlates of autistic traits across the diagnostic divide: A grey matter  
7 and white matter microstructure study. *NeuroImage Clin.* 2021;32: 102897.  
8 doi:10.1016/j.nicl.2021.102897
- 9 3. Sauer AK, Stanton JE, Hans S, Grabrucker AM. Autism Spectrum Disorders: Etiology and  
10 Pathology. In: Grabrucker AM, editor. *Autism Spectrum Disorders*. Brisbane (AU): Exon  
11 Publications; 2021. Available: <http://www.ncbi.nlm.nih.gov/books/NBK573613/>
- 12 4. Crane L, Goddard L, Pring L. Sensory processing in adults with autism spectrum disorders.  
13 *Autism.* 2009;13: 215–228. doi:10.1177/1362361309103794
- 14 5. Palmer CJ, Lawson RP, Hohwy J. Bayesian approaches to autism: Towards volatility,  
15 action, and behavior. *Psychol Bull.* 2017;143: 521–542. doi:10.1037/bul0000097
- 16 6. Pellicano E, Burr D. When the world becomes ‘too real’: a Bayesian explanation of autistic  
17 perception. *Trends Cogn Sci.* 2012;16: 504–510.
- 18 7. Brock J. Alternative Bayesian accounts of autistic perception: comment on Pellicano and  
19 Burr. *Trends Cogn Sci.* 2012;16: 573–574. doi:10.1016/j.tics.2012.10.005
- 20 8. Karvelis P, Seitz AR, Lawrie SM, Seriès P. Autistic traits, but not schizotypy, predict  
21 increased weighting of sensory information in Bayesian visual integration. *eLife.*  
22 2018;7: e34115. doi:10.7554/eLife.34115
- 23 9. Lawson RP, Rees G, Friston KJ. An aberrant precision account of autism. *Front Hum*  
24 *Neurosci.* 2014;8. doi:10.3389/fnhum.2014.00302
- 25 10. Friston KJ, Lawson R, Frith CD. On hyperpriors and hypopriors: comment on Pellicano  
26 and Burr. *Trends Cogn Sci.* 2013;17: 1. doi:10.1016/j.tics.2012.11.003
- 27 11. Lawson RP, Mathys C, Rees G. Adults with autism overestimate the volatility of the  
28 sensory environment. *Nat Neurosci.* 2017;20: 1293–1299. doi:10.1038/nn.4615
- 29 12. Lieder I, Adam V, Frenkel O, Jaffe-Dax S, Sahani M, Ahissar M. Perceptual bias reveals  
30 slow-updating in autism and fast-forgetting in dyslexia. *Nat Neurosci.* 2019;22: 256–  
31 264. doi:10.1038/s41593-018-0308-9
- 32 13. Haker H, Schneebeli M, Stephan KE. Can Bayesian Theories of Autism Spectrum Disorder  
33 Help Improve Clinical Practice? *Front Psychiatry.* 2016;7. Available:  
34 <https://www.frontiersin.org/articles/10.3389/fpsy.2016.00107>
- 35 14. Van de Cruys S, Van der Hallen R, Wagemans J. Disentangling signal and noise in autism  
36 spectrum disorder. *Brain Cogn.* 2017;112: 78–83. doi:10.1016/j.bandc.2016.08.004



- 1 15. Karaminis T, Cicchini GM, Neil L, Cappagli G, Aagten-Murphy D, Burr D, et al. Central  
2 tendency effects in time interval reproduction in autism. *Sci Rep.* 2016;6: 28570.  
3 doi:10.1038/srep28570
- 4 16. Noel J-P, De Nier MA, Stevenson R, Alais D, Wallace MT. Atypical rapid audio-visual  
5 temporal recalibration in autism spectrum disorders. *Autism Res.* 2017;10: 121–129.  
6 doi:10.1002/aur.1633
- 7 17. Croydon A, Karaminis T, Neil L, Burr D, Pellicano E. The light-from-above prior is intact in  
8 autistic children. *J Exp Child Psychol.* 2017;161: 113–125.  
9 doi:10.1016/j.jecp.2017.04.005
- 10 18. Pell PJ, Mareschal I, Calder AJ, von dem Hagen EAH, Clifford CWG, Baron-Cohen S, et al.  
11 Intact priors for gaze direction in adults with high-functioning autism spectrum  
12 conditions. *Mol Autism.* 2016;7: 25. doi:10.1186/s13229-016-0085-9
- 13 19. Noel J-P, Lakshminarasimhan KJ, Park H, Angelaki DE. Increased variability but intact  
14 integration during visual navigation in Autism Spectrum Disorder. *Proc Natl Acad Sci.*  
15 2020;117: 11158–11166. doi:10.1073/pnas.2000216117
- 16 20. Friston K. A theory of cortical responses. *Philos Trans R Soc B Biol Sci.* 2005;360: 815–  
17 836. doi:doi:10.1098/rstb.2005.1622
- 18 21. Mumford D. On the computational architecture of the neocortex. *Biol Cybern.* 1992;66:  
19 241–251.
- 20 22. Rao RP, Ballard DH. Predictive coding in the visual cortex: a functional interpretation of  
21 some extra-classical receptive-field effects. *Nat Neurosci.* 1999;2: 79–87.
- 22 23. Srinivasan MV, Laughlin SB, Dubs A. Predictive coding: a fresh view of inhibition in the  
23 retina. *Proc R Soc Lond B Biol Sci.* 1982;216: 427–459.
- 24 24. Cannon J, O'Brien AM, Bungert L, Sinha P. Prediction in Autism Spectrum Disorder: A  
25 Systematic Review of Empirical Evidence. *Autism Res.* 2021;14: 604–630.  
26 doi:10.1002/aur.2482
- 27 25. Van de Cruys S, Evers K, Van der Hallen R, Van Eysen L, Boets B, de-Wit L, et al. Precise  
28 minds in uncertain worlds: Predictive coding in autism. *Psychol Rev.* 2014;121: 649–  
29 675. doi:10.1037/a0037665
- 30 26. Gonzalez-Gadea ML, Chennu S, Bekinschtein TA, Rattazzi A, Beraudi A, Tripicchio P, et al.  
31 Predictive coding in autism spectrum disorder and attention deficit hyperactivity  
32 disorder. *J Neurophysiol.* 2015;114: 2625–2636. doi:10.1152/jn.00543.2015
- 33 27. Goris J, Braem S, Nijhof AD, Rigoni D, Deschrijver E, Van de Cruys S, et al. Sensory  
34 Prediction Errors Are Less Modulated by Global Context in Autism Spectrum Disorder.  
35 *Biol Psychiatry Cogn Neurosci Neuroimaging.* 2018;3: 667–674.  
36 doi:10.1016/j.bpsc.2018.02.003

- 1 28. Ruiz-Martínez FJ, Rodríguez-Martínez EI, Wilson CE, Yau S, Saldaña D, Gómez CM.  
2 Impaired P1 Habituation and Mismatch Negativity in Children with Autism Spectrum  
3 Disorder. *J Autism Dev Disord.* 2020;50: 603–616. doi:10.1007/s10803-019-04299-0
- 4 29. van Laarhoven T, Stekelenburg JJ, Eussen MLJM, Vroomen J. Electrophysiological  
5 alterations in motor-auditory predictive coding in autism spectrum disorder. *Autism*  
6 *Res.* 2019;12: 589–599. doi:10.1002/aur.2087
- 7 30. Utzerath C, Schmits IC, Buitelaar J, de Lange FP. Adolescents with autism show typical  
8 fMRI repetition suppression, but atypical surprise response. *Cortex.* 2018;109: 25–34.  
9 doi:10.1016/j.cortex.2018.08.019
- 10 31. Chen T-C, Hsieh MH, Lin Y-T, Chan P-YS, Cheng C-H. Mismatch negativity to different  
11 deviant changes in autism spectrum disorders: A meta-analysis. *Clin Neurophysiol.*  
12 2020;131: 766–777. doi:10.1016/j.clinph.2019.10.031
- 13 32. Schwartz S, Shinn-Cunningham B, Tager-Flusberg H. Meta-analysis and systematic  
14 review of the literature characterizing auditory mismatch negativity in individuals with  
15 autism. *Neurosci Biobehav Rev.* 2018;87: 106–117.  
16 doi:10.1016/j.neubiorev.2018.01.008
- 17 33. Bekinschtein TA, Dehaene S, Rohaut B, Tadel F, Cohen L, Naccache L. Neural signature of  
18 the conscious processing of auditory regularities. *Proc Natl Acad Sci.* 2009;106: 1672–  
19 1677. doi:10.1073/pnas.0809667106
- 20 34. Chao ZC, Takaura K, Wang L, Fujii N, Dehaene S. Large-Scale Cortical Networks for  
21 Hierarchical Prediction and Prediction Error in the Primate Brain. *Neuron.* 2018;100:  
22 1252–1266. doi:10.1016/j.neuron.2018.10.004
- 23 35. Chennu S, Noreika V, Gueorguiev D, Blenkmann A, Kochen S, Ibáñez A, et al. Expectation  
24 and attention in hierarchical auditory prediction. *J Neurosci.* 2013;33: 11194–11205.
- 25 36. El Karoui I, King J-R, Sitt J, Meyniel F, Van Gaal S, Hasboun D, et al. Event-Related  
26 Potential, Time-frequency, and Functional Connectivity Facets of Local and Global  
27 Auditory Novelty Processing: An Intracranial Study in Humans. *Cereb Cortex.* 2014;25:  
28 4203–4212.
- 29 37. Strauss M, Sitt JD, King J-R, Elbaz M, Azizi L, Buiatti M, et al. Disruption of hierarchical  
30 predictive coding during sleep. *Proc Natl Acad Sci.* 2015;112: E1353–E1362.
- 31 38. Uhrig L, Dehaene S, Jarraya B. A Hierarchy of Responses to Auditory Regularities in the  
32 Macaque Brain. *J Neurosci.* 2014;34: 1127–1132. doi:10.1523/JNEUROSCI.3165-  
33 13.2014
- 34 39. Wacongne C, Labyt E, Wassenhove V van, Bekinschtein T, Naccache L, Dehaene S.  
35 Evidence for a hierarchy of predictions and prediction errors in human cortex. *Proc*  
36 *Natl Acad Sci.* 2011;108: 20754–20759. doi:10.1073/pnas.1117807108

- 1 40. Komatsu M, Kaneko T, Okano H, Ichinohe N. Chronic Implantation of Whole-cortical  
2 Electrocorticographic Array in the Common Marmoset. *J Vis Exp JoVE*. 2019.  
3 doi:10.3791/58980
- 4 41. Watanabe S, Kurotani T, Oga T, Noguchi J, Isoda R, Nakagami A, et al. Functional and  
5 molecular characterization of a non-human primate model of autism spectrum  
6 disorder shows similarity with the human disease. *Nat Commun*. 2021;12: 5388.  
7 doi:10.1038/s41467-021-25487-6
- 8 42. Chao ZC, Huang YT, Wu C-T. A quantitative model reveals a frequency ordering of  
9 prediction and prediction-error signals in the human brain. *Commun Biol*. 2022;5: 1–  
10 18. doi:10.1038/s42003-022-04049-6
- 11 43. Nakamura M, Nakagami A, Nakagaki K, Yasue M, Kawai N, Ichinohe N. Prenatal valproic  
12 acid-induced autism marmoset model exhibits higher salivary cortisol levels. *Front*  
13 *Behav Neurosci*. 2022;16: 943759. doi:10.3389/fnbeh.2022.943759
- 14 44. Hata J, Nakae K, Tsukada H, Woodward A, Haga Y, Iida M, et al. Multi-modal brain  
15 magnetic resonance imaging database covering marmosets with a wide age range. *Sci*  
16 *Data*. 2023;10: 221. doi:10.1038/s41597-023-02121-2
- 17 45. Pouget A, Beck JM, Ma WJ, Latham PE. Probabilistic brains: knowns and unknowns. *Nat*  
18 *Neurosci*. 2013;16: 1170–1178. doi:10.1038/nn.3495
- 19 46. Harshman RA, Lundy ME. PARAFAC: Parallel factor analysis. *Comput Stat Data Anal*.  
20 1994;18: 39–72. doi:doi:10.1016/0167-9473(94)90132-5
- 21 47. Bro R, Kiers HA. A new efficient method for determining the number of components in  
22 PARAFAC models. *J Chemom*. 2003;17: 274–286. doi:doi:10.1002/cem.801
- 23 48. Jiang Y, Komatsu M, Chen Y, Xie R, Zhang K, Xia Y, et al. Constructing the hierarchy of  
24 predictive auditory sequences in the marmoset brain. Griffiths TD, King AJ, editors.  
25 *eLife*. 2022;11: e74653. doi:10.7554/eLife.74653
- 26 49. Xu J, Zhou L, Liu F, Xue C, Jiang J, Jiang C. The autistic brain can process local but not  
27 global emotion regularities in facial and musical sequences. *Autism Res*. 2022;15: 222–  
28 240. doi:10.1002/aur.2635
- 29 50. Bouvet L, Simard-Meilleur A-A, Paignon A, Mottron L, Donnadieu S. Auditory local bias  
30 and reduced global interference in autism. *Cognition*. 2014;131: 367–372.  
31 doi:10.1016/j.cognition.2014.02.006
- 32 51. Palmer CJ, Paton B, Kirkovski M, Enticott PG, Hohwy J. Context sensitivity in action  
33 decreases along the autism spectrum: a predictive processing perspective. *Proc R Soc B*  
34 *Biol Sci*. 2015;282: 20141557. doi:10.1098/rspb.2014.1557
- 35 52. Chambon V, Farrer C, Pacherie E, Jacquet PO, Leboyer M, Zalla T. Reduced sensitivity to  
36 social priors during action prediction in adults with autism spectrum disorders.  
37 *Cognition*. 2017;160: 17–26. doi:10.1016/j.cognition.2016.12.005

- 1 53. Robic S, Sonié S, Fonlupt P, Henaff M-A, Touil N, Coricelli G, et al. Decision-Making in a  
2 Changing World: A Study in Autism Spectrum Disorders. *J Autism Dev Disord.* 2015;45:  
3 1603–1613. doi:10.1007/s10803-014-2311-7
- 4 54. Sevgi M, Diaconescu AO, Henco L, Tittgemeyer M, Schilbach L. Social Bayes: Using  
5 Bayesian Modeling to Study Autistic Trait–Related Differences in Social Cognition. *Biol*  
6 *Psychiatry.* 2020;87: 185–193. doi:10.1016/j.biopsych.2019.09.032
- 7 55. Lieder F, Daunizeau J, Garrido MI, Friston KJ, Stephan KE. Modelling Trial-by-Trial  
8 Changes in the Mismatch Negativity. *PLOS Comput Biol.* 2013;9: e1002911.  
9 doi:10.1371/journal.pcbi.1002911
- 10 56. Mars RB, Debener S, Gladwin TE, Harrison LM, Haggard P, Rothwell JC, et al. Trial-by-  
11 Trial Fluctuations in the Event-Related Electroencephalogram Reflect Dynamic Changes  
12 in the Degree of Surprise. *J Neurosci.* 2008;28: 12539–12545.  
13 doi:10.1523/JNEUROSCI.2925-08.2008
- 14 57. Sedley W, Gander PE, Kumar S, Kovach CK, Oya H, Kawasaki H, et al. Neural signatures of  
15 perceptual inference. *eLife.* 2016;5: e11476.
- 16 58. Anderson LA, Christianson GB, Linden JF. Stimulus-Specific Adaptation Occurs in the  
17 Auditory Thalamus. *J Neurosci.* 2009;29: 7359–7363. doi:10.1523/JNEUROSCI.0793-  
18 09.2009
- 19 59. Malmierca MS, Cristaudo S, Pérez-González D, Covey E. Stimulus-Specific Adaptation in  
20 the Inferior Colliculus of the Anesthetized Rat. *J Neurosci.* 2009;29: 5483–5493.  
21 doi:10.1523/JNEUROSCI.4153-08.2009
- 22 60. Taaseh N, Yaron A, Nelken I. Stimulus-Specific Adaptation and Deviance Detection in the  
23 Rat Auditory Cortex. *PLOS ONE.* 2011;6: e23369. doi:10.1371/journal.pone.0023369
- 24 61. Dawson M, Mottron L, Gernsbacher MA. Learning in Autism. *Learning and Memory: A*  
25 *Comprehensive Reference.* Elsevier; 2008. pp. 759–772. doi:10.1016/B978-012370509-  
26 9.00152-2
- 27 62. Bourgeron T. From the genetic architecture to synaptic plasticity in autism spectrum  
28 disorder. *Nat Rev Neurosci.* 2015;16: 551–563. doi:10.1038/nrn3992
- 29 63. LeBlanc JJ, Fagiolini M. Autism: A “Critical Period” Disorder? *Neural Plast.* 2011;2011:  
30 e921680. doi:10.1155/2011/921680
- 31 64. Mathys C, Daunizeau J, Friston KJ, Stephan KE. A bayesian foundation for individual  
32 learning under uncertainty. *Front Hum Neurosci.* 2011;5: 39.  
33 doi:10.3389/fnhum.2011.00039
- 34 65. Clark A. Whatever next? Predictive brains, situated agents, and the future of cognitive  
35 science. *Behav Brain Sci.* 2013;36: 181–204. doi:10.1017/S0140525X12000477

- 1 66. Frässle S, Aponte EA, Bollmann S, Brodersen KH, Do CT, Harrison OK, et al. TAPAS: An  
2 Open-Source Software Package for Translational Neuromodeling and Computational  
3 Psychiatry. *Front Psychiatry*. 2021;12: 680811. doi:10.3389/fpsy.2021.680811
- 4 67. Iglesias S, Mathys C, Brodersen KH, Kasper L, Piccirelli M, den Ouden HEM, et al.  
5 Hierarchical Prediction Errors in Midbrain and Basal Forebrain during Sensory Learning.  
6 *Neuron*. 2013;80: 519–530. doi:10.1016/j.neuron.2013.09.009
- 7 68. Meyniel F. Brain dynamics for confidence-weighted learning. *PLOS Comput Biol*.  
8 2020;16: e1007935. doi:10.1371/journal.pcbi.1007935
- 9 69. Powers AR, Mathys C, Corlett PR. Pavlovian conditioning–induced hallucinations result  
10 from overweighting of perceptual priors. *Science*. 2017;357: 596–600.  
11 doi:10.1126/science.aan3458
- 12 70. Vossel S, Mathys C, Stephan KE, Friston KJ. Cortical Coupling Reflects Bayesian Belief  
13 Updating in the Deployment of Spatial Attention. *J Neurosci*. 2015;35: 11532–11542.  
14 doi:10.1523/JNEUROSCI.1382-15.2015
- 15 71. Friston KJ, Harrison L, Penny W. Dynamic causal modelling. *Neuroimage*. 2003;19: 1273–  
16 1302.
- 17 72. Garrido MI, Friston KJ, Kiebel SJ, Stephan KE, Baldeweg T, Kilner JM. The functional  
18 anatomy of the MMN: A DCM study of the roving paradigm. *NeuroImage*. 2008;42:  
19 936–944. doi:10.1016/j.neuroimage.2008.05.018
- 20 73. Garrido MI, Kilner JM, Kiebel SJ, Friston KJ. Dynamic Causal Modeling of the Response to  
21 Frequency Deviants. *J Neurophysiol*. 2009;101: 2620–2631. doi:10.1152/jn.90291.2008
- 22 74. Watakabe A, Skibbe H, Nakae K, Abe H, Ichinohe N, Rachmadi MF, et al. Local and long-  
23 distance organization of prefrontal cortex circuits in the marmoset brain. *Neuron*. 2023  
24 [cited 3 Jul 2023]. doi:10.1016/j.neuron.2023.04.028
- 25 75. Okano H. Current Status of and Perspectives on the Application of Marmosets in  
26 Neurobiology. *Annu Rev Neurosci*. 2021;44: 27–48. doi:10.1146/annurev-neuro-  
27 030520-101844
- 28 76. Yasue M, Nakagami A, Banno T, Nakagaki K, Ichinohe N, Kawai N. Indifference of  
29 marmosets with prenatal valproate exposure to third-party non-reciprocal interactions  
30 with otherwise avoided non-reciprocal individuals. *Behav Brain Res*. 2015;292: 323–  
31 326. doi:10.1016/j.bbr.2015.06.006
- 32 77. Yasue M, Nakagami A, Nakagaki K, Ichinohe N, Kawai N. Inequity aversion is observed in  
33 common marmosets but not in marmoset models of autism induced by prenatal  
34 exposure to valproic acid. *Behav Brain Res*. 2018;343: 36–40.  
35 doi:10.1016/j.bbr.2018.01.013
- 36 78. Cox RW. AFNI: Software for Analysis and Visualization of Functional Magnetic Resonance  
37 Neuroimages. *Comput Biomed Res*. 1996;29: 162–173. doi:10.1006/cbmr.1996.0014

- 1 79. Avants BB, Tustison NJ, Song G, Cook PA, Klein A, Gee JC. A reproducible evaluation of  
2 ANTs similarity metric performance in brain image registration. *NeuroImage*. 2011;54:  
3 2033–2044. doi:10.1016/j.neuroimage.2010.09.025
- 4 80. Delorme A, Makeig S. EEGLAB: an open source toolbox for analysis of single-trial EEG  
5 dynamics including independent component analysis. *J Neurosci Methods*. 2004;134:  
6 9–21. doi:doi:10.1016/j.jneumeth.2003.10.009
- 7 81. Oostenveld R, Fries P, Maris E, Schoffelen JM. FieldTrip: open source software for  
8 advanced analysis of MEG, EEG, and invasive electrophysiological data. *Comput Intell*  
9 *Neurosci*. 2011;2011.
- 10 82. Maris E, Oostenveld R. Nonparametric statistical testing of EEG-and MEG-data. *J*  
11 *Neurosci Methods*. 2007;164: 177–190.
- 12 83. Chao ZC, Dillon DG, Liu Y-H, Barrick EM, Wu C-T. Altered coordination between frontal  
13 delta and parietal alpha networks underlies anhedonia and depressive rumination in  
14 major depressive disorder. *J Psychiatry Neurosci*. 2022;47: E367–E378.  
15 doi:10.1503/jpn.220046
- 16 84. Chao ZC, Nagasaka Y, Fujii N. Cortical network architecture for context processing in  
17 primate brain. *eLife*. 2015;4: e06121.
- 18 85. Chao ZC, Sawada M, Isa T, Nishimura Y. Dynamic Reorganization of Motor Networks  
19 During Recovery from Partial Spinal Cord Injury in Monkeys. *Cereb Cortex*. 2019;29:  
20 3059–3073. doi:10.1093/cercor/bhy172
- 21 86. Andersson CA, Bro R. The N-way Toolbox for MATLAB. *Chemom Intell Lab Syst*. 2000;52:  
22 1–4. doi:doi:10.1016/S0169-7439(00)00071-X
- 23 87. Cichocki A, Zdunek R, Phan AH, Amari S. Nonnegative matrix and tensor factorizations:  
24 applications to exploratory multi-way data analysis and blind source separation. John  
25 Wiley & Sons; 2009.
- 26

1 **Figures:**

2

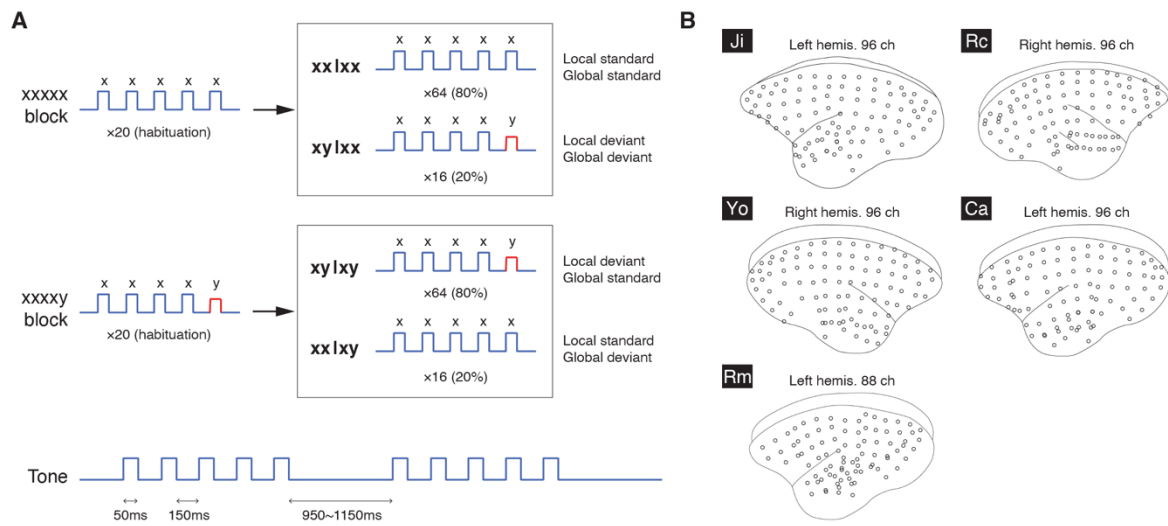

3

4 **Figure 1. Local-Global Paradigm and ECoG Layouts.** (A) The local-global paradigm and

5 the tone and sequence designs. (B) The layout of the 96-channel ECoG arrays in the five

6 subjects. For Rm, 8 channels were surgical removed after implantation due to tissue

7 adhesion, and 88 channels remained.

8

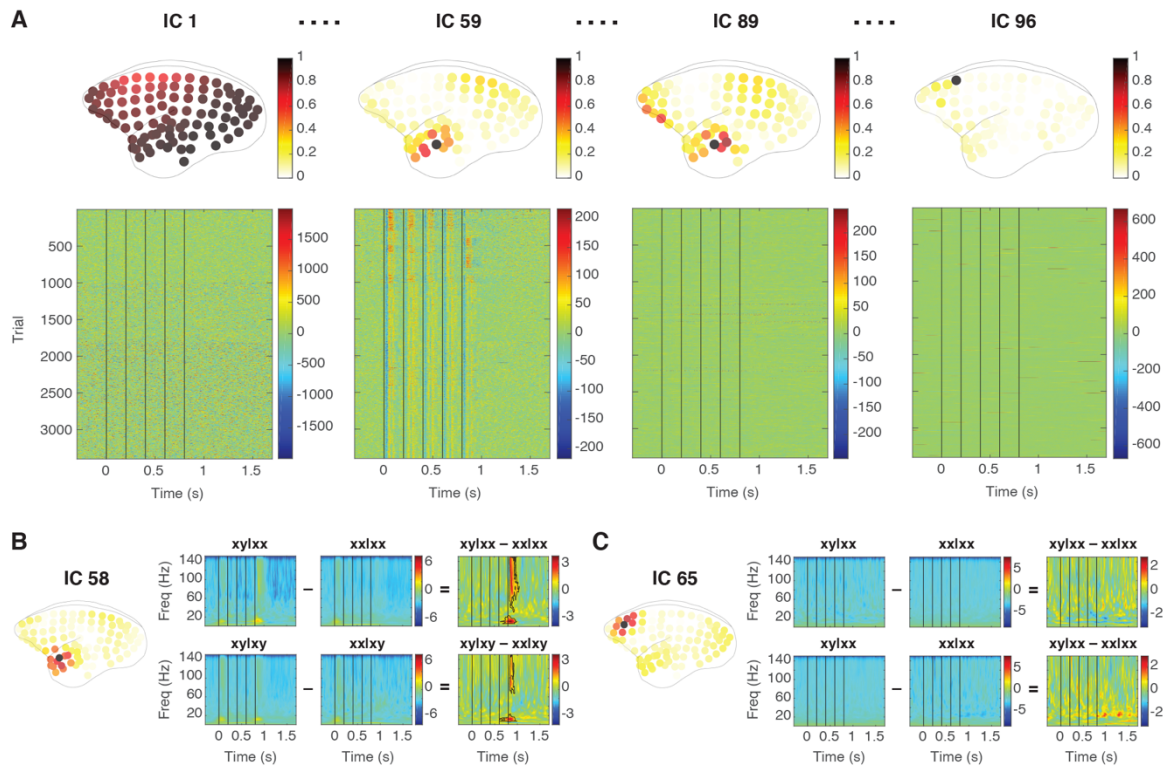

1

2 **Figure 2. Source Signals and Deviant Responses.** (A) Examples of ICs from Ji. For each  
3 IC, the absolute spatial contributions were normalized by the maximal value across

4 electrodes, and shown on the top panel. The time courses of all the trials are shown in the  
5 bottom panel. Time zero represents the onset of the first tone, and the vertical black lines

6 indicate the onsets of the 5 tones. (B) The deviant responses from IC 58 in Ji. The spatial  
7 contribution of the IC is shown on the left. The ERSP for each trial type and the

8 corresponding contrasts are shown. The black contours indicate the deviant response with a  
9 significant difference in ERSP in contrasts  $xy|xx - xx|xx$  and  $xy|xy - xx|xy$ . (C) Example of a

10 non-significant IC. The same representation is used as in panel B.

11



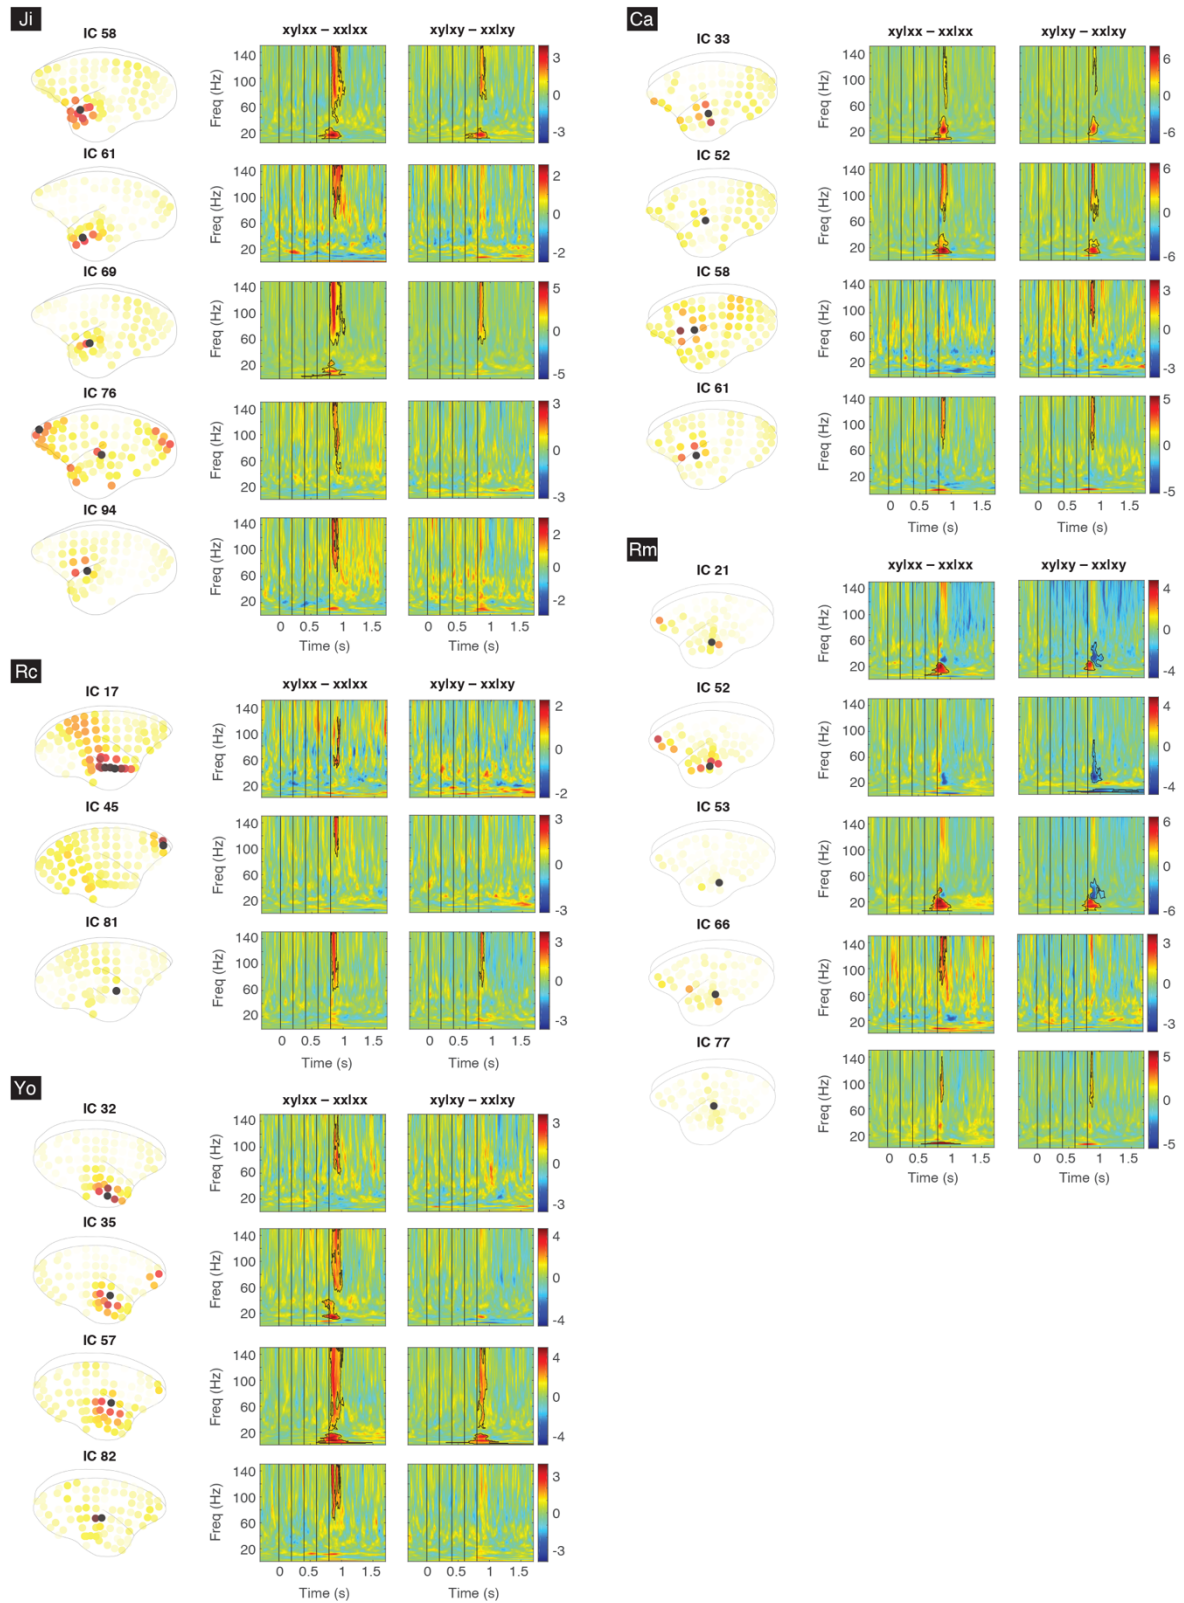

1

2 **Figure 3. Significant ICs From All Subjects.** For each subject, all the significant ICs are

3 labeled and shown with their absolute spatial contributions and the corresponding deviant

4 responses in contrasts  $xy|xx - xx|xx$  and  $xy|xy - xx|xy$  (black contours).

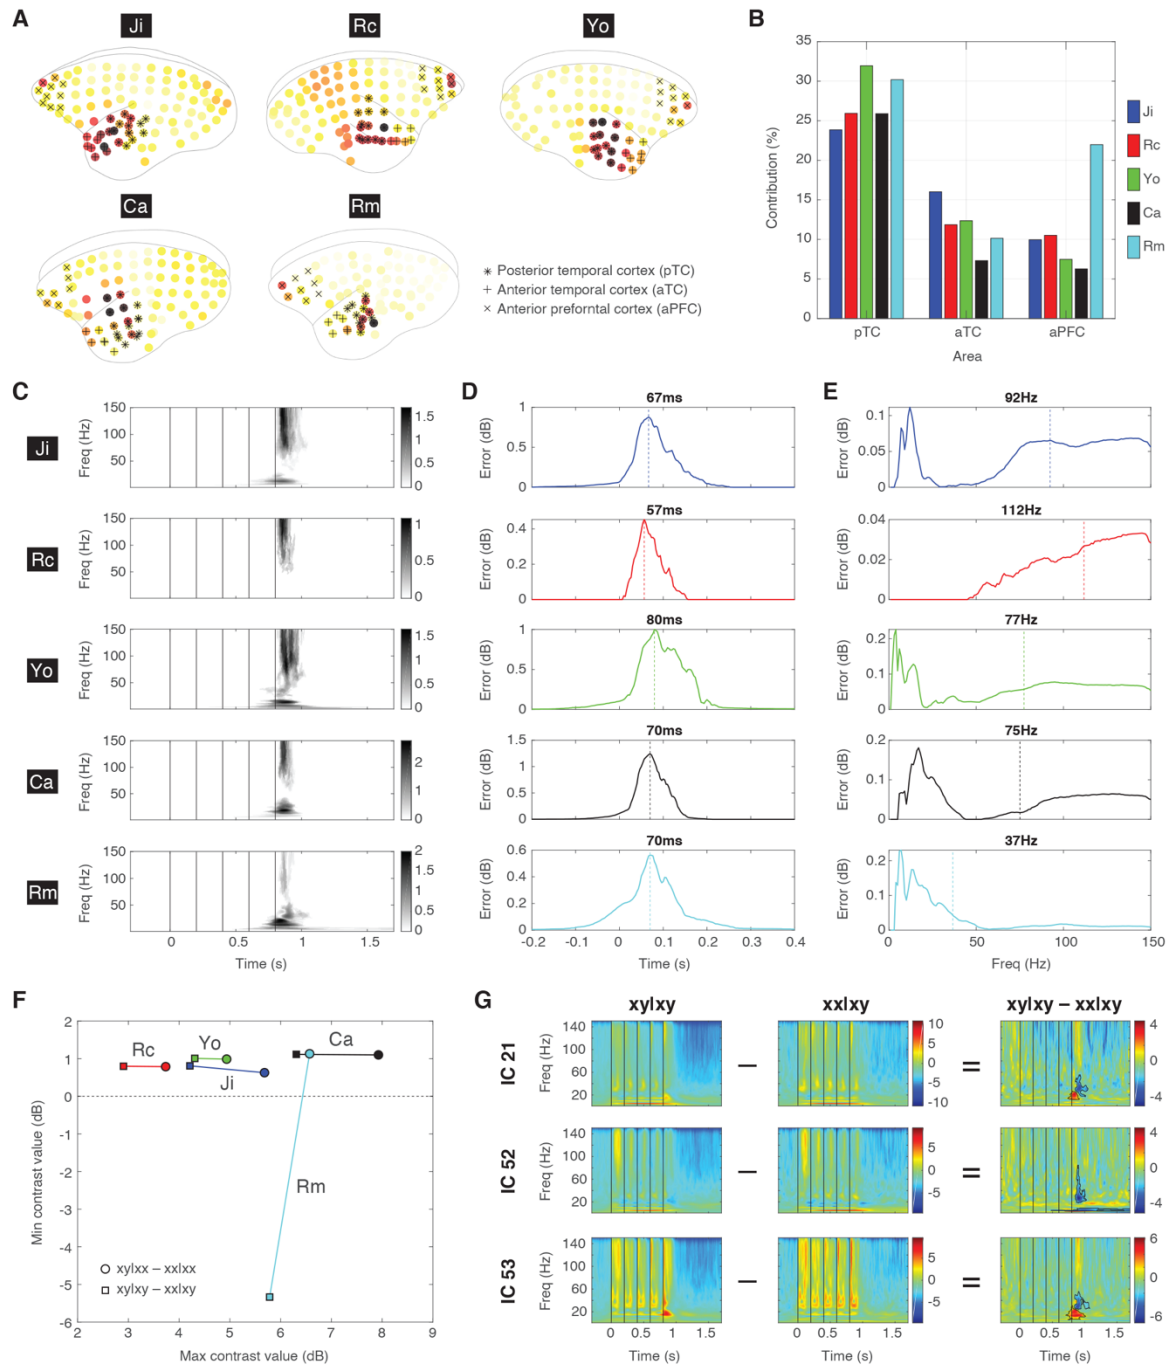

1

2 **Figure 4. Univariate Analysis of the Significant ICs.** (A) The joint topographic map of

3 deviant responses for each subject. The electrodes on pTC, aTC, and aPFC are labeled with

4 black star, plus, and cross signs, respectively. (B) The relative contributions of pTC,

5 and aPFC for each subject. (C) The joint time-frequency representation of deviant responses

6 for each subject. (D) The temporal profile of deviant responses. The peak response is

7 indicated by a vertical dashed line and the latency is indicated. (E) The spectral profile of

1 deviant responses. The average frequency is indicated by a vertical dashed line and the value  
2 is indicated. (F) The maximal and minimal sizes of the deviant responses for each subject.  
3 The contrasts  $xy|xx - xx|xx$  and  $xy|xy - xx|xy$  are indicated by circles and squares,  
4 respectively. The color scheme is shared in panels B, D, E, and F. (G) The negative deviant  
5 responses in  $xy|xy - xx|xy$  in Rm for three significant ICs (21, 52, and 53, as in Figure 3).  
6 The ERSP in  $xy|xy$  and  $xx|xy$  are also shown.

7

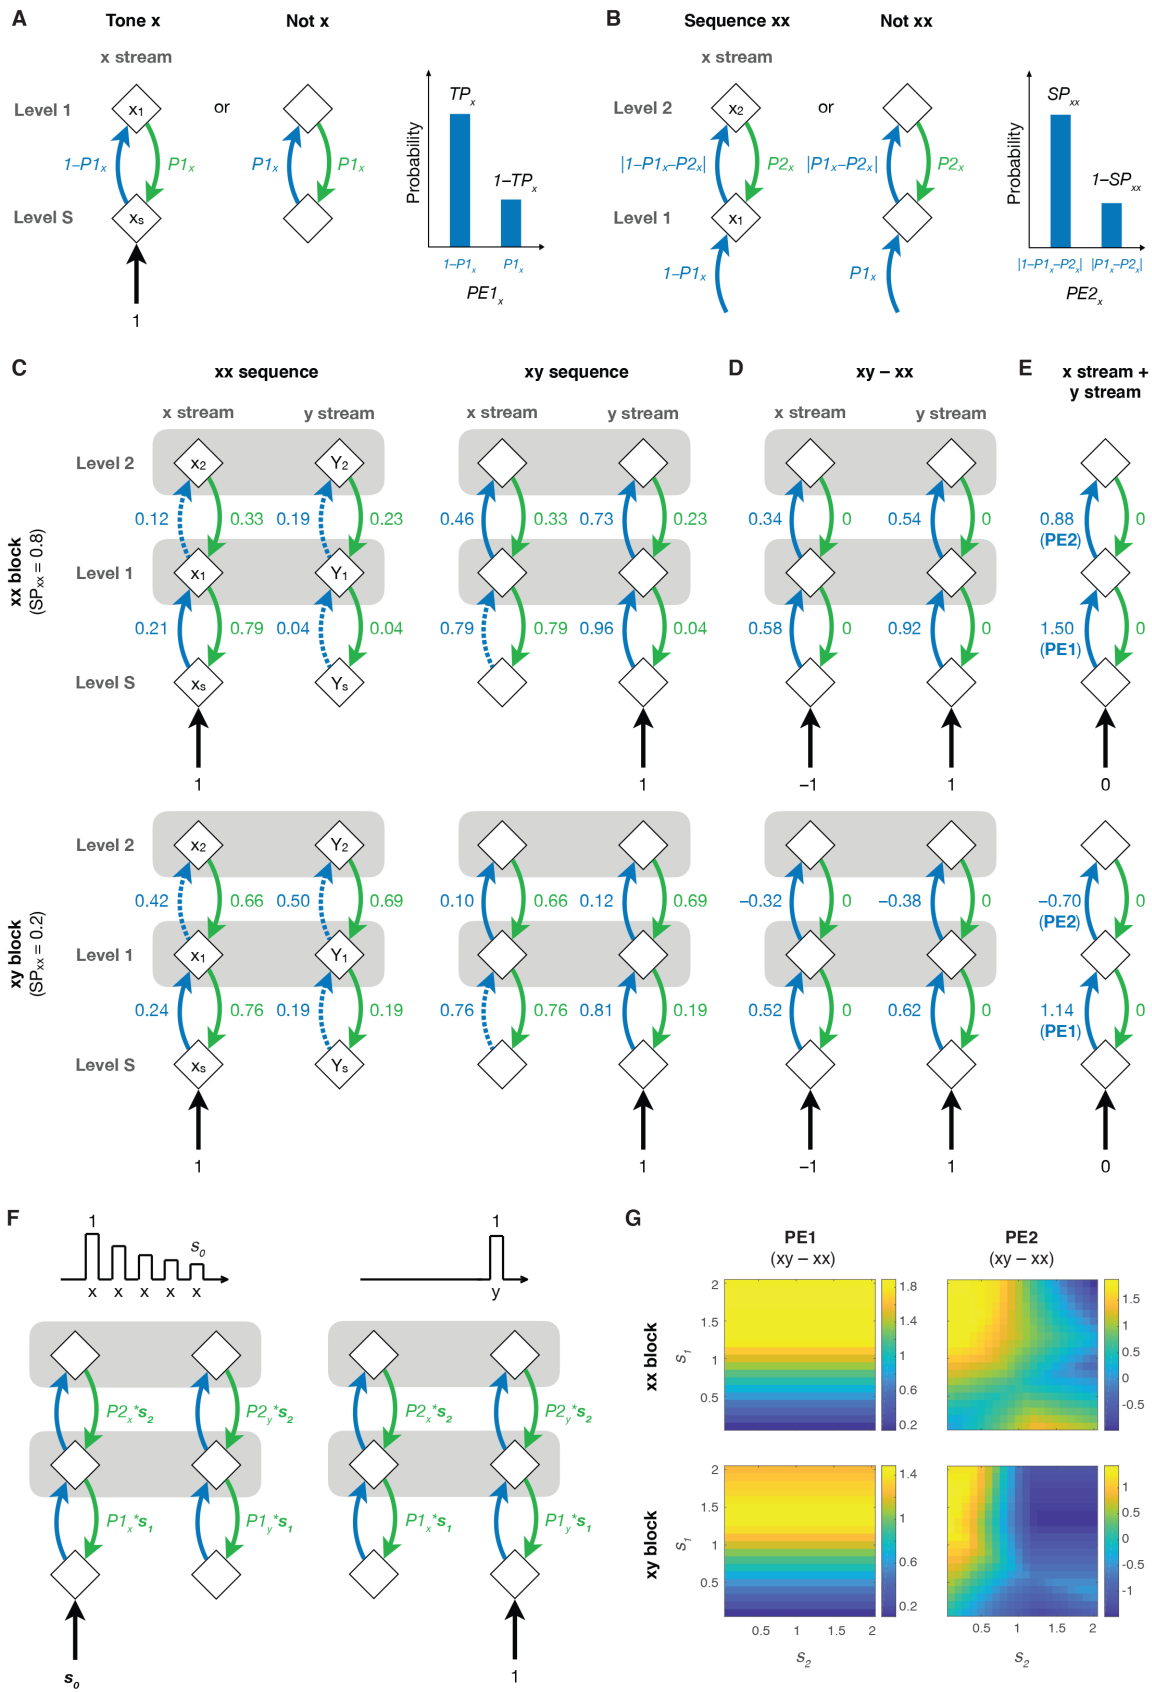

1

2 **Figure 5. A Quantitative Predictive Coding Model.** (A) The proposed neural operations in  
 3 the x stream between Levels S and 1 during the presentation of tone x or not. An explanatory

1 illustration of the probability distribution of the first-level prediction error in the x stream  
2 ( $PE1_x$ ) is shown on the right. The neuronal populations (diamonds), prediction-error signal  
3 (blue arrow), prediction signal (green arrow), and sensory input (black arrow) are shown. (B)  
4 The neural operations in the x stream between Levels 1 and 2. An explanatory probability  
5 distribution of the second-level prediction error in the x stream ( $PE2_x$ ) is shown on the right.  
6 (C) The complete model during the last tone in xx and xy sequences in the xx and xy blocks.  
7 The horizontal gray bars at Levels 1 and 2 indicate integration between the x and y streams  
8 for computing transition and sequence probabilities, respectively. The negative errors, where  
9 the prediction is greater than the input or prediction error to be predicted, are shown in blue  
10 dashed arrows. (D) The contrast values ( $xy - xx$ ) obtained from panel C. (E) The model  
11 values of PE1 and PE2 in the deviant responses by combining contrast values from the x and  
12 y streams in panel D. (F) Model tunings with  $s_0$ ,  $s_1$ , and  $s_2$ . A decreased response (scaled by  
13  $s_0$ ) to repeated tone x during the xx sequence (left), and a fresh response to tone y during the  
14 xy sequence (right). The corresponding models of the last tone are also shown, where P1 and  
15 P2 are scaled by  $s_1$ , and  $s_2$ , respectively. (G) An example of PE1 and PE2 in the deviant  
16 responses in the xx and xy blocks under different combinations of  $s_1$  and  $s_2$  when  $s_0 = 1$ .  
17  
18

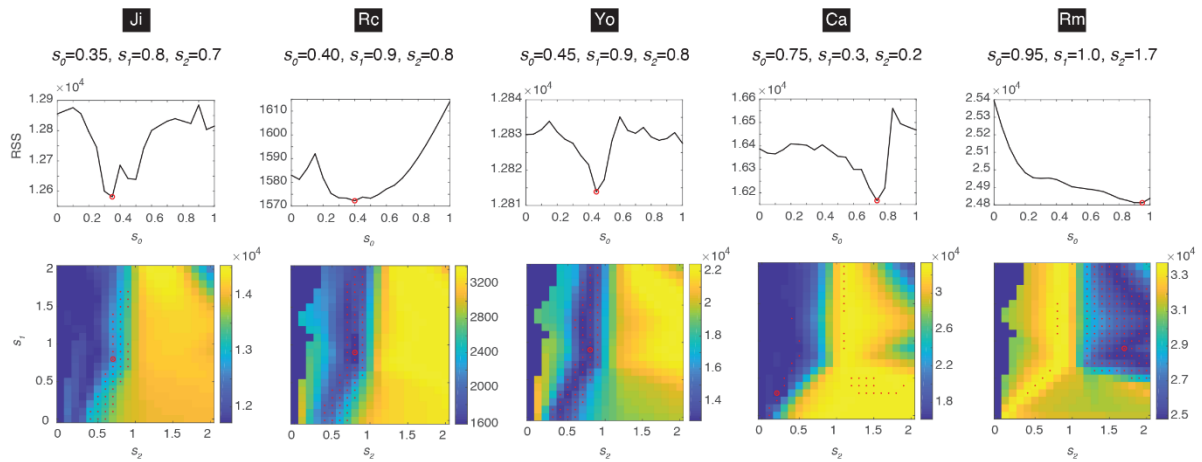

1

2

**Figure 6. The Optimal Parameter for Model Fitting.** The model-fitting results for each

3

subject are shown in each column, where the optimal parameters are indicated. For each  $s_0$ ,

4

the minimal RSS across different combinations  $s_1$  and  $s_2$  is shown in the top panel. The

5

minimal RSS is indicated by a red circle. The combination of  $s_1$  and  $s_2$  under this minimum is

6

indicated by a red circle in the bottom panel. Models with a fitting consistency  $>80\%$  are

7

indicated by red dots. The color bar represents RSS.

8

9

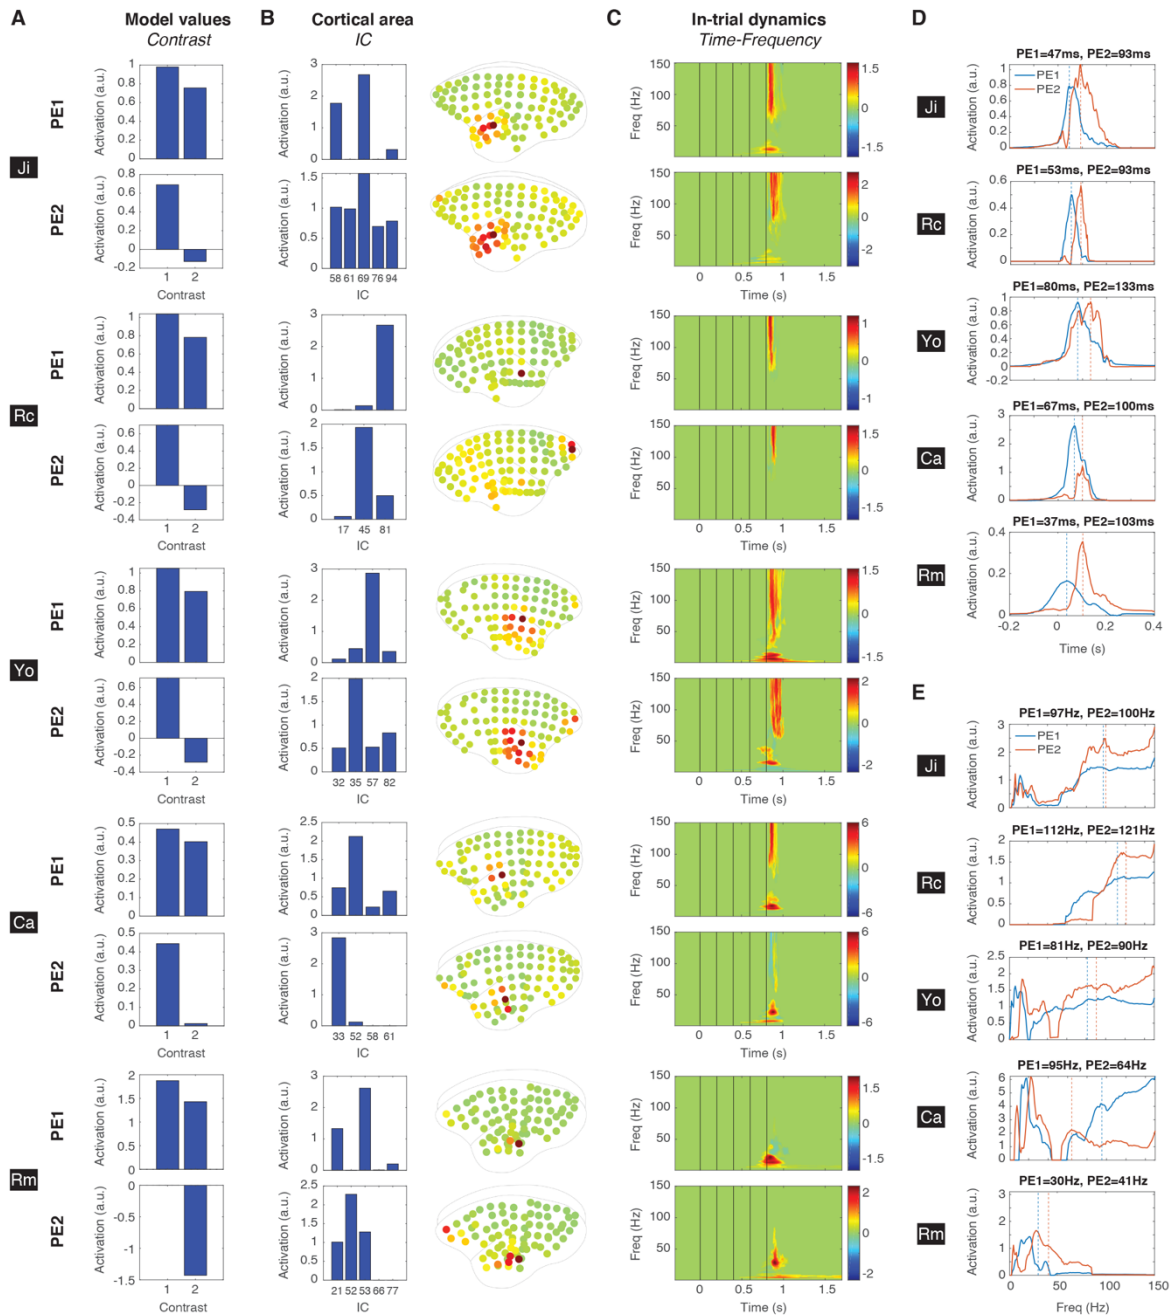

1

2 **Figure 7. Prediction-Error Signals Extracted From the Best-Fitting Model. (A)** The

3 contributions of PE1 and PE2 to the deviant responses in the two contrasts, which are based

4 on the model values from the best-fitting model. (B) The spatial dimension of the PE1 and

5 PE2 components extracted from the best-fitting model. The contribution of each significant

6 IC to PE1 and PE2 and the corresponding average brain maps are shown. (C) The spectro-

7 temporal dimension of the PE1 and PE2 components extracted from the best-fitting model.

8 (D) The temporal profiles of PE1 (blue) and PE2 (orange). The maximal activations are

- 1 indicated as vertical dashed lines and the corresponding peak latencies are shown. (E) The
- 2 spectral profiles of PE1 and PE2. The average frequencies activations are indicated as
- 3 vertical dashed lines and the corresponding values are shown.
- 4



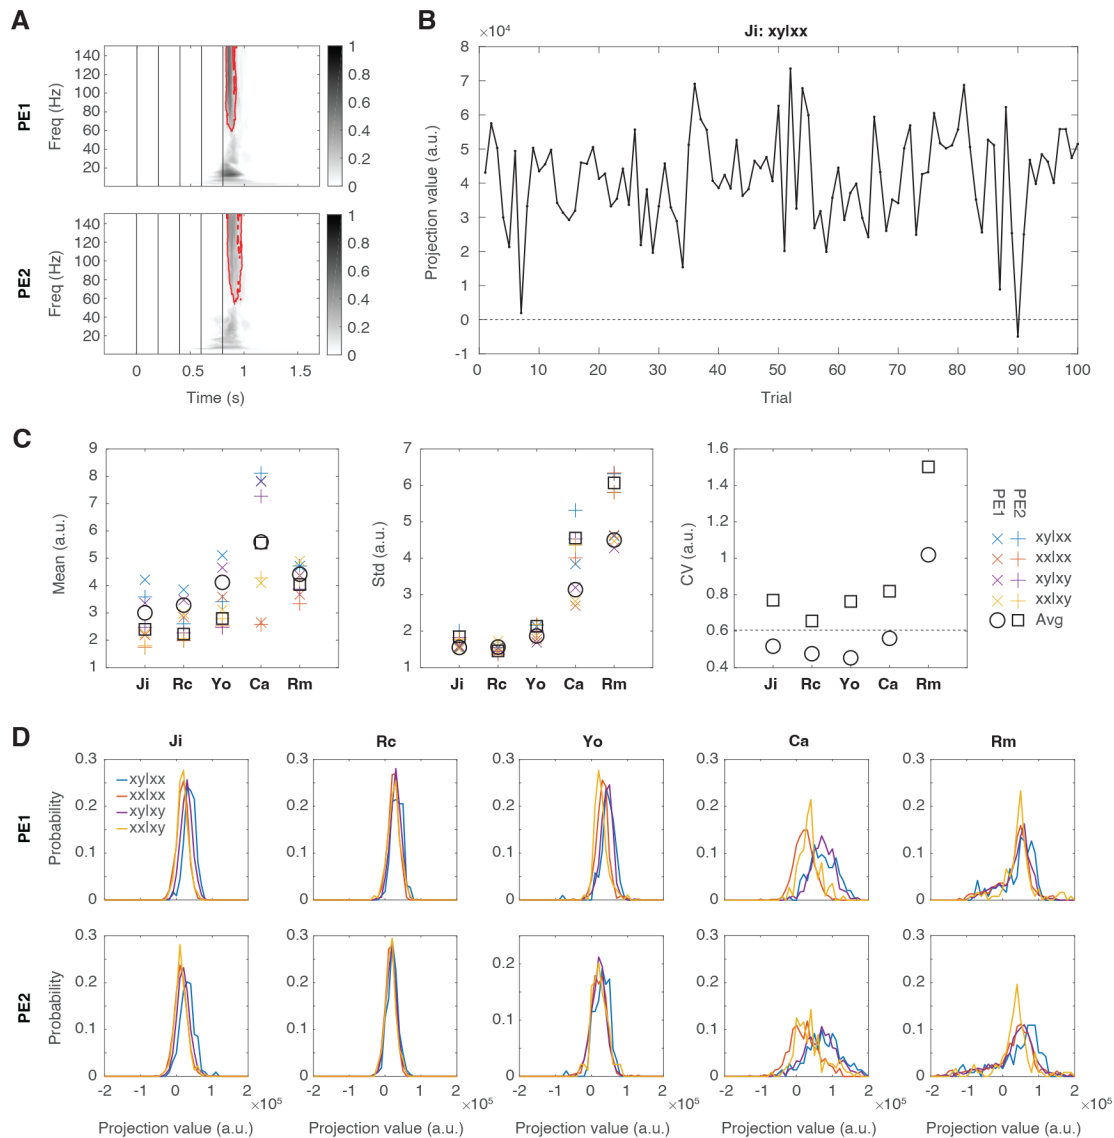

1  
2 **Figure 8. Signal Variability Underlying Absent High-Gamma Components.** (A) The  
3 spectro-temporal structures of PE1 and PE2. The masks of the top 75% values in the high-  
4 gamma band ( $> 40\text{Hz}$ ) are indicated by red contours. (B) An example of the projection values  
5 during 100 trials of xy|xx in Ji. (C) The mean, standard deviation, and CV of the single-trial  
6 projection values. The mean and standard deviation measured for each trial type are labeled  
7 with different colors. The average values across all trial types are indicated by black circles  
8 and squares for PE1 and PE2, respectively. CV calculated from the average values are shown.  
9 The horizontal dashed line indicates the mean CV from the unexposed (across PE1 and PE2).  
10 (D) The probability distributions of the projection values for PE1 (top row) and PE2 (bottom

- 1 row) in each subject. The probability distribution for each trial types are shown in different
- 2 colors (same color scheme as in panel C).
- 3
